## 1 **Towards understanding diversity, endemicy and global change vulnerability of soil fungi**

2

3 Leho Tedersoo<sup>1\*</sup>, Vladimir Mikryukov<sup>2</sup>, Alexander Zizka<sup>3</sup>, Mohammad Bahram<sup>4</sup>, Niloufar Hagh-  
4 Doust<sup>2</sup>, Sten Anslan<sup>2</sup>, Oleh Prylutskyi<sup>5</sup>, Manuel Delgado-Baquerizo<sup>6</sup>, Fernando T. Maestre<sup>7</sup>, Jaan  
5 Pärn<sup>2</sup>, Maarja Öpik<sup>2</sup>, Mari Moora<sup>2</sup>, Martin Zobel<sup>2</sup>, Mikk Espenberg<sup>2</sup>, Ülo Mander<sup>2</sup>, Abdul Nasir  
6 Khalid<sup>8</sup>, Adriana Corrales<sup>9</sup>, Ahto Agan<sup>10</sup>, Aída-M. Vasco-Palacios<sup>11</sup>, Alessandro Saitta<sup>12</sup>, Andrea C.  
7 Rinaldi<sup>13</sup>, Annemieke Verbeken<sup>14</sup>, Bobby P. Sulisty<sup>15</sup>, Boris Tamgnoue<sup>16</sup>, Brendan Furneaux<sup>17</sup>,  
8 Camila Duarte Ritter<sup>18</sup>, Casper Nyamukondiwa<sup>19</sup>, Cathy Sharp<sup>20</sup>, César Marín<sup>21</sup>, Daniyal Gohar<sup>1</sup>,  
9 Darta Klavina<sup>22</sup>, Dipon Sharmah<sup>23</sup>, Dong Qin Dai<sup>24</sup>, Eduardo Nouhra<sup>25</sup>, Elisabeth Machteld Biersma<sup>26</sup>,  
10 Elisabeth Rähn<sup>10</sup>, Erin K. Cameron<sup>27</sup>, Eske De Crop<sup>14</sup>, Eveli Otsing<sup>1</sup>, Evgeny A. Davydov<sup>28</sup>, Felipe E.  
11 Albornoz<sup>29</sup>, Francis Q. Brearley<sup>30</sup>, Franz Buegger<sup>31</sup>, Geoffrey Zahn<sup>32</sup>, Gregory Bonito<sup>33</sup>, Inga  
12 Hiiesalu<sup>2</sup>, Isabel C. Barrio<sup>34</sup>, Jacob Heilmann-Clausen<sup>35</sup>, Jelena Ankuda<sup>36</sup>, John Y. Kupagme<sup>1</sup>, Jose G.  
13 Maciá-Vicente<sup>37</sup>, Joseph Djeugap Fovo<sup>16</sup>, József Geml<sup>38</sup>, Juha M. Alatalo<sup>39</sup>, Julieta Alvarez-  
14 Manjarrez<sup>40</sup>, Kadri Pöldmaa<sup>2</sup>, Kadri Runnel<sup>2</sup>, Kalev Adamson<sup>10</sup>, Kari Anne Bråthen<sup>41</sup>, Karin Pritsch<sup>31</sup>,  
15 Kassim I. Tchan<sup>42</sup>, Kęstutis Armolaitis<sup>36</sup>, Kevin D. Hyde<sup>43</sup>, Kevin K. Newsham<sup>44</sup>, Kristel Panksep<sup>45</sup>,  
16 Adebola A. Lateef<sup>46</sup>, Liis Tiirmann<sup>1</sup>, Linda Hansson<sup>47</sup>, Louis J. Lamit<sup>48,49</sup>, Malka Saba<sup>50</sup>, Maria  
17 Tuomi<sup>41</sup>, Marieka Gryzenhout<sup>51</sup>, Marijn Bauters<sup>52</sup>, Meike Piepenbring<sup>53</sup>, Nalin Wijayawardene<sup>24</sup>,  
18 Nourou S. Yorou<sup>42</sup>, Olavi Kurina<sup>54</sup>, Peter E. Mortimer<sup>55</sup>, Peter Meidl<sup>56</sup>, Petr Kohout<sup>57</sup>, R. Henrik  
19 Nilsson<sup>58</sup>, Rasmus Puusepp<sup>1</sup>, Rein Drenkhan<sup>10</sup>, Roberto Garibay-Orijel<sup>59</sup>, Roberto Godoy<sup>60</sup>, Saad  
20 Alkahtani<sup>61</sup>, Saleh Rahimlou<sup>1</sup>, Sergey V. Dudov<sup>62</sup>, Sergei Pölme<sup>1</sup>, Soumya Ghosh<sup>51</sup>, Sunil Mundra<sup>63</sup>,  
21 Talaat Ahmed<sup>39</sup>, Tarquin Netherway<sup>4</sup>, Terry W. Henkel<sup>64</sup>, Tomas Roslin<sup>4</sup>, Vincent Nteziryayo<sup>65</sup>,  
22 Vladimir E. Fedosov<sup>62</sup>, Vladimir G. Onipchenko<sup>62</sup>, W. A. Erandi Yasanthika<sup>43</sup>, Young Woon Lim<sup>66</sup>,  
23 Nadejda A. Soudzilovskaia<sup>67</sup>, Alexandre Antonelli<sup>68</sup>, Urmas Kõljalg<sup>2</sup>, Kessy Abarenkov<sup>69</sup>

24

25 <sup>1</sup>Center of Mycology and Microbiology, University of Tartu, Tartu, Estonia

26 <sup>2</sup>Institute of Ecology and Earth Sciences, University of Tartu, Tartu, Estonia

27 <sup>3</sup>Department of Biology, Philipps-University, Marburg, Germany

28 <sup>4</sup>Department of Ecology, Swedish University of Agricultural Sciences, Uppsala, Sweden

29 <sup>5</sup>Department of Mycology and Plant Resistance, School of Biology, V.N. Karazin Kharkiv National  
30 University, Kharkiv, Ukraine

31 <sup>6</sup>Instituto de Recursos Naturales y Agrobiología de Sevilla (IRNAS), CSIC, Sevilla, Spain

32 <sup>7</sup>Instituto Multidisciplinar para el Estudio del Medio ‘Ramón Margalef’ and Departamento de  
33 Ecología, Universidad de Alicante; 03690, Alicante, Spain

34 <sup>8</sup>Institute of Botany, University of the Punjab, Lahore, Pakistan

35 <sup>9</sup>Centro de Investigaciones en Microbiología y Biotecnología-UR (CIMBIUR), Universidad del  
36 Rosario, Bogotá, Colombia

- 37 <sup>10</sup>Institute of Forestry and Engineering, Estonian University of Life Sciences, Tartu, Estonia
- 38 <sup>11</sup>Escuela de Microbiología, Universidad de Antioquia, Medellín, Antioquia, Colombia
- 39 <sup>12</sup>Department of Agricultural, Food and Forest Sciences, University of Palermo, Palermo, Italy
- 40 <sup>13</sup>Department of Biomedical Sciences, University of Cagliari, Cagliari, Italy
- 41 <sup>14</sup>Department Biology, Ghent University, Ghent, Belgium
- 42 <sup>15</sup>Department of Biomedicine, Indonesia International Institute for Life Sciences, Jakarta, Indonesia
- 43 <sup>16</sup>Department of Crop Science, University of Dschang, Dschang, Cameroon
- 44 <sup>17</sup>Department of Ecology and Genetics, Uppsala University, Uppsala, Sweden
- 45 <sup>18</sup>Departamento de Zootecnia, Universidade Federal do Paraná, Curitiba, PR, Brazil
- 46 <sup>19</sup>Department of Biological Sciences and Biotechnology, Botswana International University of  
47 Science and Technology, Palapye, Botswana
- 48 <sup>20</sup>Natural History Museum of Zimbabwe, Bulawayo, Zimbabwe
- 49 <sup>21</sup>Centro de Investigación e Innovación para el Cambio Climático (CiiCC), Universidad Santo Tomás,  
50 Santiago, Chile
- 51 <sup>22</sup>Latvian State Forest Research Institute Silava, Salaspils, Latvia
- 52 <sup>23</sup>Department of Botany, Jawaharlal Nehru Rajkeeya Mahavidyalaya, Pondicherry University, Port  
53 Blair, India
- 54 <sup>24</sup>College of Biological Resource and Food Engineering, Qujing Normal University, Qujing, Yunnan,  
55 China
- 56 <sup>25</sup>Instituto Multidisciplinario de Biología Vegetal (CONICET), Universidad Nacional de Córdoba,  
57 Córdoba, Argentina
- 58 <sup>26</sup>Natural History Museum of Denmark, Copenhagen, Denmark
- 59 <sup>27</sup>Department of Environmental Science, Saint Mary's University, Halifax, Nova Scotia, Canada
- 60 <sup>28</sup>Altai State University, Barnaul, Russia
- 61 <sup>29</sup>CSIRO Land and Water, Wembley, WA, Australia
- 62 <sup>30</sup>Department of Natural Sciences, Manchester Metropolitan University, Manchester, UK
- 63 <sup>31</sup>Helmholtz Zentrum München, Neuherberg, Germany
- 64 <sup>32</sup>Utah Valley University, Orem UT, USA
- 65 <sup>33</sup>Plant, Soil and Microbial Sciences, Michigan State University, East Lansing MI, USA
- 66 <sup>34</sup>Faculty of Natural and Environmental Sciences, Agricultural University of Iceland, Hvanneyri,  
67 Iceland
- 68 <sup>35</sup>Center for Macroecology, Evolution and Climate, University of Copenhagen, Copenhagen,  
69 Denmark
- 70 <sup>36</sup>Department of Silviculture and Ecology, Institute of Forestry of Lithuanian Research Centre for  
71 Agriculture and Forestry (LAMMC). Girionys, Lithuania
- 72 <sup>37</sup>Plant Ecology and Nature Conservation, Wageningen University & Research, Wageningen, The  
73 Netherlands

- 74 <sup>38</sup>ELKH-EKKE Lendület Environmental Microbiome Research Group, Eszterházy Károly Catholic  
75 University, Eger, Hungary
- 76 <sup>39</sup>Environmental Science Center, Qatar University, Doha, Qatar
- 77 <sup>40</sup>Biology Department, Stanford University, Stanford CA, USA
- 78 <sup>41</sup>Department of Arctic and Marine Biology, The Arctic University of Norway, Tromsø, Norway
- 79 <sup>42</sup>Research Unit Tropical Mycology and Plants-Soil Fungi Interactions, University of Parakou,  
80 Parakou, Benin
- 81 <sup>43</sup>Center of Excellence in Fungal Research, Mae Fah Luang University, Chiang Rai, Thailand
- 82 <sup>44</sup>NERC British Antarctic Survey, High Cross, Cambridge, UK
- 83 <sup>45</sup>Chair of Hydrobiology and Fishery, Estonian University of Life Sciences, Tartu, Estonia
- 84 <sup>46</sup>Department of Plant Biology, University of Ilorin, Ilorin, Nigeria
- 85 <sup>47</sup>Gothenburg Centre for Sustainable Development, Gothenburg, Sweden
- 86 <sup>48</sup>Department of Biology, Syracuse University, Syracuse NY, USA
- 87 <sup>49</sup>Department of Environmental and Forest Biology, State University of New York College of  
88 Environmental Science and Forestry, Syracuse NY, USA
- 89 <sup>50</sup>Department of Plant Sciences, Quaid-i-Azam University, Islamabad, Pakistan
- 90 <sup>51</sup>Department of Genetics, University of the Free State, Bloemfontein, South Africa
- 91 <sup>52</sup>Department of Environment, Ghent University, Ghent, Belgium
- 92 <sup>53</sup>Mycology Working Group, Goethe University Frankfurt am Main, Frankfurt am Main, Germany
- 93 <sup>54</sup>Institute of Agricultural and Environmental Sciences, Estonian University of Life Sciences, Tartu,  
94 Estonia
- 95 <sup>55</sup>Center For Mountain Futures, Kunming Institute of Botany, Chinese Academy of Sciences,  
96 Kunming, China
- 97 <sup>56</sup>Freie Universität Berlin, Institut für Biologie, Berlin, Germany
- 98 <sup>57</sup>Institute of Microbiology, Czech Academy of Sciences, Prague, Czech Republic
- 99 <sup>58</sup>Gothenburg Global Biodiversity Centre, University of Gothenburg, Gothenburg, Sweden
- 100 <sup>59</sup>Instituto de Biología, Universidad Nacional Autónoma de México, Ciudad de México, México
- 101 <sup>60</sup>Instituto Ciencias Ambientales y Evolutivas, Universidad Austral de Chile, Valdivia, Chile
- 102 <sup>61</sup>College of Science, King Saud University, Riyadh, Saudi Arabia
- 103 <sup>62</sup>Department of Ecology and Plant Geography, Moscow Lomonosov State University, Moscow,  
104 Russia
- 105 <sup>63</sup>Department of Biology, College of Science, United Arab Emirates University, Abu Dhabi, UAE
- 106 <sup>64</sup>Department of Biological Sciences, California State Polytechnic University, Arcata CA, USA
- 107 <sup>65</sup>Department of Food Science and Technology, University of Burundi, Bujumbura, Burundi
- 108 <sup>66</sup>School of Biological Sciences and Institute of Microbiology, Seoul National University, Seoul,  
109 Korea
- 110 <sup>67</sup>Centre for Environmental Sciences, Hasselt University, Hasselt, Belgium

111 <sup>68</sup>Royal Botanic Gardens, Kew, Richmond, United Kingdom

112 <sup>69</sup>University of Tartu Natural History Museum, Tartu, Estonia

113 \*Corresponding author. Email: [leho.tedersoo@ut.ee](mailto:leho.tedersoo@ut.ee); tel. +372 56654986

114

115 **Keywords:** biodiversity, climate change, global change vulnerability, conservation priorities, global  
116 maps, biogeography, mycorrhizal fungi, pathogens, saprotrophs

117

## 118 **Summary**

119 Fungi play pivotal roles in ecosystem functioning, but little is known about their global patterns of  
120 diversity, endemism, vulnerability to global change drivers and conservation priority areas. We  
121 applied the high-resolution PacBio sequencing technique to identify fungi based on a long DNA  
122 marker that revealed a high proportion of hitherto unknown fungal taxa. We used a Global Soil  
123 Mycobiome consortium dataset to test relative performance of various sequencing depth  
124 standardization methods (calculation of residuals, exclusion of singletons, traditional and SRS  
125 rarefaction, use of Shannon index of diversity) to find optimal protocols for statistical analyses.  
126 Altogether, we used six global surveys to infer these patterns for soil-inhabiting fungi and their  
127 functional groups. We found that residuals of log-transformed richness (including singletons) against  
128 log-transformed sequencing depth yields significantly better model estimates compared with most  
129 other standardization methods. With respect to global patterns, fungal functional groups differed in  
130 the patterns of diversity, endemism and vulnerability to main global change predictors. Unlike  $\alpha$ -  
131 diversity, endemism and global-change vulnerability of fungi and most functional groups were  
132 greatest in the tropics. Fungi are vulnerable mostly to drought, heat, and land cover change. Fungal  
133 conservation areas of highest priority include wetlands and moist tropical ecosystems.

134

## 135 **Introduction**

136 Human activities affect nearly all habitats through changes in climate and land-use, which in turn alter  
137 vegetation cover and composition. These changes negatively impact many species that have narrow  
138 environmental tolerances and limited dispersal capacity across anthropogenic landscapes (Schulte to  
139 Bühne et al. 2020). Anthropogenic impacts most strongly affect endemic species – i.e., taxa with small  
140 distribution ranges and narrow ecological niches (Brook et al. 2008). Diversity of endemic plants and  
141 animals is higher in areas characterized by historical stability, high precipitation, environmental  
142 heterogeneity, and insularity. Unfortunately, these areas usually coincide with major human  
143 degradations of the environment (Kier et al. 2009; Stein et al. 2014; Sandel et al. 2020).

144 Unlike the situation with plants and animals, global patterns of fungal diversity, endemism and  
145 vulnerability to environmental change remain virtually unknown (Cameron et al. 2019; Guerra et al.  
146 2021b; but see Talbot et al. 2014; Davison et al. 2015). This is alarming, given the fundamental roles  
147 that fungi play in carbon and nutrient cycling processes (Wardle & Lindahl 2014; Crowther et al. 2019).  
148 Comparative studies have indicated that aboveground and belowground biodiversity are driven by  
149 different environmental predictors at local and global scales (Cameron et al. 2019; Le Provost et al.  
150 2021). This suggests differential responses of macro- and microorganisms to land use and climate  
151 changes (Guerra et al. 2021b). As for plants and animals, soil fungal communities are likely vulnerable  
152 to global change drivers. For instance, high-temperature stress (Malcolm et al. 2008; Barcnas-Moreno  
153 et al. 2009; Morgado et al. 2015; Misiak et al. 2021) and prolonged drought (Schmidt et al. 2017; de  
154 Vries et al. 2018) can alter fungal growth, functionality and community composition. Likewise, changes  
155 in land use that result in habitat fragmentation may lead to shifts in prevalence of pathogenic,  
156 mutualistic, and free-living fungal groups (Brinkmann et al. 2019; Makiola et al. 2019; Le Provost et  
157 al. 2021; Rodriguez-Ramos et al. 2021).

158 While thousands of plant and animal species are listed as threatened on the IUCN global Red List, only  
159 262 out of an estimated 2.2-3.8 million fungal species (Hawksworth & Lücking 2017) have been listed  
160 as such. The majority of these are from high-income countries in temperate regions (IUCN 2021) and  
161 are from fungal groups that make conspicuous macroscopic fruiting bodies (Cui et al. 2021). However,  
162 the vast majority of fungi produce no or inconspicuous fruiting bodies and are therefore hard to survey,  
163 which has hampered their conservation assessment (Gonçalves et al. 2021).

164 Here we used the most advanced high-resolution sequencing technology to globally survey soil fungal  
165 diversity and assess their endemism and vulnerability to global change. We hypothesized that i) the  
166 endemism of fungi is relatively higher in the tropics due to greater regional climatic stability; and ii)  
167 vulnerability of fungi to global change is highest in habitats experiencing the strongest global warming  
168 effects (polar regions) and intensive land use (dry tropics). We predicted that because of their intimate  
169 associations with other organisms, endemism and vulnerability patterns are more evident for  
170 macrofungi and biotrophic groups compared with saprotrophic microfungal groups. We then propose  
171 global conservation priorities for these ecologically pivotal fungi.

172

## 173 **Results and Discussion**

### 174 *Fungal diversity*

175 We used the recently generated Global Soil Mycobiome consortium dataset (GSMc; 3,200 plots,  
176 Tedersoo et al. 2021b) along with data from five other global soil surveys (**Fig. 1**; see methods) and  
177 international nucleotide sequence databases to determine the diversity and endemism of fungal

178 functional groups – *viz.* arbuscular mycorrhizal (AM) fungi, ectomycorrhizal (EcM) fungi, non-EcM  
179 Agaricomycetes (mostly saprotrophic macrofungi), molds, pathogens, opportunistic human parasites  
180 (OHPs, mostly thermophilic saprotrophs), early-diverging unicellular lineages (mostly chytrids,  
181 aphelids, and rozellids), and yeasts. Compared to previous meta-analytical approaches (e.g. Vetrovsky  
182 et al. 2019), our cumulative data comprise the largest available globally standardized database based  
183 on directly comparable soil sampling and long-read molecular analysis protocols. Collectively, all  
184 datasets yielded 20,182,427 fungal reads composed of 905,841 ‘species’ – operational taxonomic  
185 units (OTUs), each defined as <98% sequence similarity of the rRNA ITS barcode from all other  
186 OTUs. The genera *Tomentella* (Basidiomycota), *Penicillium* (Ascomycota), and *Mortierella*  
187 (*Mortierellomycota*) were the most species-rich (**Fig. 1**).

188 We combined machine-learning and general linear modeling (GLM) approaches to find the best  
189 predictors of fungal species richness and the Shannon index of diversity for settling the contrasting  
190 results obtained from previous global studies (Tedersoo et al. 2014; Egidi et al. 2019; Vetrovsky et al.  
191 2019). At the site scale ( $\alpha$ -diversity), the best supported results were obtained for residuals of  
192 logarithm-transformed richness accounting for sequencing depth (**Fig. 2**). Since the datasets were  
193 retrieved using different sampling design and therefore differed strongly in the inferred richness (**Fig.**  
194 **3**), we focused mainly on analyses of the largest, GSMc dataset. Total fungal richness had a broadly  
195 unimodal relationship with soil pH ( $R^2_{\text{adj}}=0.133$ ) and responded positively to vegetation age  
196 ( $R^2_{\text{adj}}=0.045$ ; **Fig. 4**). Deserts and Antarctic habitats supported the lowest richness among all biomes  
197 (**Fig. 4**). We validated the results using several datasets, in which fungal richness had a unimodal  
198 relationship with soil pH and positive response to mean annual precipitation (MAP)(**Fig. 5**). Across  
199 datasets, fungal  $\gamma$ -diversity at the ecoregion level was best explained by average MAP ( $R^2_{\text{adj}}=0.179$ ;  
200 **Fig. 6**). The differences in richness trends between  $\alpha$ -diversity and  $\gamma$ -diversity indicate that high  
201 precipitation favors niche differentiation at the regional scale, as reflected by higher turnover between  
202 sites (i.e. increasing  $\alpha$ - to  $\gamma$ -diversity).

203 Our results thus update previous patterns of  $\alpha$ -diversity decrease (Tedersoo et al. 2014) or increase  
204 (Vetrovsky et al. 2019) at high latitudes and confirm relatively lower fungal diversity in Antarctica.  
205 The latter pattern has been/can be ascribed to low plant diversity and coverage (Newsham et al. 2016).  
206 The more prominent latitudinal gradient in  $\gamma$ -diversity reflects a greater positive effect of MAP on the  
207 regional fungal species pool. Disregarding Antarctica, the lack of a global  $\alpha$ -diversity latitudinal  
208 gradient in fungi is unique among terrestrial organisms (Kinlock et al. 2018). By comparison, the  $\gamma$ -  
209 diversity patterns detected resemble those found for soil fauna (Aslani et al. 2022; Potapov et al.  
210 2022) and protistan parasites (Oliverio et al. 2020), all which show slight richness peaks in tropical  
211 latitudes. The distinctly weaker latitudinal diversity gradients of soil organisms compared with most  
212 aquatic and terrestrial macro-organisms may be related to indirect effects of temperature-related  
213 climatic variables as well as soil pH and C/N ratio as main drivers of soil habitat quality. The

214 differences may also be related to higher dispersal capacity of soil organisms who have microscopic  
215 body sizes or dispersal propagules (Soininen et al. 2013; Aslani et al. 2022).

216

### 217 *Fungal endemism*

218 To estimate relative endemism among the world's ecoregions (**Fig. 7; Table 1; see methods**), we  
219 combined indices of community similarity, uniqueness, and species ranges into an overall endemism  
220 index (see Methods). Five metrics were combined, including the number and proportion of endemic  
221 species, mean maximum geographical range of species, Jaccard index, and beta-sim index (**Box 1**).  
222 We found that endemism of all fungi peaked in moist tropical biomes and it was positively related to  
223 mean annual air temperature (MAT;  $R^2_{\text{adj}}=0.277$ ; **Fig. 8**) and soil acidity ( $R^2_{\text{adj}}=0.108$ ; **Table 2**).

224 While endemism patterns of non-EcM Agaricomycetes and AM fungi were similar to those shown  
225 for all fungi, different patterns were found for other functional groups. Endemism of EcM fungi was  
226 related to high mean annual precipitation (MAP) ( $R^2_{\text{adj}}=0.147$ ). Molds, pathogens and yeasts showed  
227 multiple endemism hotspots. Molds ( $R^2_{\text{adj}}=0.199$ ) and pathogens ( $R^2_{\text{adj}}=0.105$ ) had relatively greater  
228 endemism in strongly acidic or alkaline soils, indicating that extreme soil conditions may support  
229 unique soil biota, with limited effective dispersal across edaphically extreme habitats. Human  
230 footprint (see Methods) had a weak negative effect on endemism of all fungi ( $R^2_{\text{adj}}=0.018$ ),  
231 pathogens ( $R^2_{\text{adj}}=0.015$ ), and OHPs ( $R^2_{\text{adj}}=0.056$ ), suggesting that anthropogenic habitat loss or  
232 homogenization may affect endemic species (Finderup Nielsen et al. 2019). European ecoregions had  
233 the lowest endemism for all fungi ( $R^2_{\text{adj}}=0.065$ ), pathogens ( $R^2_{\text{adj}}=0.086$ ) and unicellular fungi  
234 ( $R^2_{\text{adj}}=0.035$ ) compared with those of other areas. Averaged current aerial bioclimatic variables better  
235 explained endemism compared with the ranges of those variables or bioclimatic variables of soil and  
236 last glacial maximum (LGM). Climate change since the LGM had a weak positive effect on  
237 endemism of molds (mean diurnal range and overall climate change:  $R^2_{\text{adj}}=0.073$ ) and OHPs  
238 (isothermality and mean diurnal range:  $R^2_{\text{adj}}=0.056$ ) but not other groups.

239 We found that patterns in fungal endemism were relatively consistent among the five individual  
240 endemism indices and that they resemble endemism patterns of vascular plants and animals, which  
241 exhibit major hotspots in wet tropical habitats (Kier et al. 2009; Barlow et al. 2018). However,  
242 endemism patterns in fungi were somewhat weaker, which may reflect the greater long-distance  
243 dispersal capacity of fungal spores relative to propagules of plants and animals (Golan & Pringle 2017).  
244 In terms of the greater macroorganism richness and endemism found in the tropics, the literature  
245 abounds with hypotheses, including narrower niche breadth, more asymmetric interactions (i.e., greater  
246 specialization), climatic stability, and more rapid evolution due to environmental energy (Vazquez &  
247 Stevens 2004; Brown 2013) in the tropics than elsewhere. Negligible effects of the LGM suggest that

248 climatic stability is not an important driver of fungal endemism, a pattern that contrasts with those of  
249 plants and animals (Rosauer & Jetz 2015). The greater phylogenetic diversity of fungi noted for the  
250 tropics (e.g. Tedersoo et al. 2018) may in part reflect tropical origins for many lineages, as well as the  
251 radiation and rapid speciation of a limited number of EcM fungal genera into higher latitude areas  
252 (Kennedy et al. 2012; Sanchez-Ramirez et al. 2015). On a global scale, plant diversity does not appear  
253 to be causally related to fungal diversity (Tedersoo et al. 2014), but there is some evidence for stronger  
254 mutualistic plant-fungal interactions related to high rainfall (Pöhlme et al. 2018). Pathogenic interactions  
255 warrant further research in this respect, given their major importance as regulators of plant diversity  
256 (Chen et al. 2019). Tropical soil fungi have relatively greater dispersal limitations (Bahram et al. 2013)  
257 and narrower distribution ranges (Tedersoo et al. 2014), suggesting that high local diversity may  
258 contribute to greater regional-scale endemism.

259

### 260 *Vulnerability of fungi to global change drivers*

261 Communities with many species at their environmental niche limits may be particularly vulnerable to  
262 local extinctions (Watson et al. 2013; Smith et al. 2020b). Thus, we evaluated the relative vulnerability  
263 of soil fungal functional groups by estimating the percentage of species occurring at their upper niche  
264 limits to three major global change drivers – land use (land cover change), heat (maximum monthly  
265 temperature), and drought (lowest quarterly precipitation). We projected to the year 2070 relative to the  
266 2015 baseline, using the average vulnerability index (Smith et al. 2020b), land use extrapolations of the  
267 LUH2 global dataset (Hurtt et al. 2020), and climatic extrapolations based on the CCS8.5 scenario  
268 (Karger et al. 2021). For all fungi taken together, predicted vulnerability to heat (best predictor:  
269 maximum monthly temperature;  $R^2_{\text{adj}}=0.583$ ) and drought (precipitation seasonality;  $R^2_{\text{adj}}=0.456$ ) were  
270 the greatest in the tropical and subtropical latitudes. Vulnerability to land use change (isothermality;  
271  $R^2_{\text{adj}}=0.145$ ) peaked in the tropics. The overall additive global change vulnerability was thus the highest  
272 in densely populated tropical and subtropical regions. Fungal functional groups had similar  
273 vulnerability patterns, which were mostly related to temperature. Among fungal groups, average  
274 vulnerability scores were highest for AM and EcM symbionts and unicellular fungi, but these scores  
275 differed only slightly across the global change drivers (**Fig. 9**). The actual vulnerability is probably  
276 underestimated for biotrophic pathogens and EcM fungi, because these groups associate with a limited  
277 number of plant species and are sometimes host-specific (Kennedy et al. 2015). Therefore, the loss of  
278 one of the few key symbiotic partners may greatly reduce the biotic niche of specialist fungi.

279 Patterns of vulnerability in fungi are somewhat similar to those of terrestrial plants and animals,  
280 where vulnerability peaks in drylands prone to desertification (Warren et al. 2013), arctic/alpine areas  
281 (cold-adapted species), and regions with dense human populations (Watson et al. 2013). The  
282 relatively low vulnerability to heat in tundra-inhabiting fungi can be explained by their relatively high



283 temperature optima (Maynard et al. 2019; but see Misiak et al. 2021), acclimation (Romero-Olivares  
284 et al. 2017), and poleward migration potential, despite relatively greater predicted warming in Arctic  
285 ecosystems. Above certain tolerance thresholds, soil organisms may be physiologically constrained by  
286 increasing soil temperature and evaporation, lower soil water potentials, and loss of oxygen due to  
287 greater respiration and faster decomposition, which result in hampered soil functioning and ecosystem  
288 multifunctionality (Delgado-Baquerizo et al. 2017). Open areas are predicted to increase due to  
289 climate change and human activities. This will further expose soil to solar radiation and result in the  
290 loss of fungal plant hosts. While here we calculated average vulnerabilities by adding up the effects of  
291 individual drivers, global change impacts tend to be synergistic (Rillig et al. 2019), so actual  
292 vulnerabilities may be much higher.

293

#### 294 *Implications for conservation*

295 Most fungi and soil organisms do not enjoy the protection and conservation measures that are  
296 afforded to more “charismatic” animals and plants (Ducarme et al. 2013). Nonetheless, fungi and  
297 other soil biota are pivotal to soil health, nutrient cycling, water storage, food security, and many  
298 other ecosystem services. Their biodiversity should hence be brought to the center stage of global  
299 sustainability thinking and conservation planning. For example, these organisms should be factored in  
300 when selecting protected areas otherwise based on plant and animal conservation (Guerra et al.  
301 2021a). The fact that many EcM and plant pathogenic fungal species are associated with specific host  
302 plants indicates that on the local scale it is not only the narrowly-distributed species but also unique  
303 biotic associations that require focused conservation measures. From the fungal perspective, it is  
304 particularly important to protect plant species that act as hubs in modules of biotic interaction  
305 networks, because these hub species typically associate with multiple, distinct fungal partners (Pölme  
306 et al. 2018). In other cases, certain unique plant species or higher taxonomic groups should be  
307 prioritized. For example, in southern South America, the drought-sensitive tree family Nothofagaceae  
308 is the only group known to support EcM fungi that are endemic to this area (Godoy & Marin 2019)

309 Although the vulnerability to environmental change differed among fungal groups, their overall global  
310 patterns were similar. This suggests that broad habitat conservation measures may work for most  
311 fungal groups, including macroscopic non-EcM Agaricomycetes and EcM fungi as well as more  
312 cryptic pathogens and other groups. To accomplish this, fungi need to be incorporated into  
313 conservation frameworks (Gonçalves et al. 2021). Actions to fill existing information gaps at the local  
314 and global levels must also be taken, and global-scale surveys should take into account the soil  
315 biodiversity assessments, complementing the traditional collections-based assessment with  
316 metabarcoding of environmental DNA. This applies to national conservation evaluation programs and  
317 engagement in global policy-making initiatives, such as the System of Environmental Economic

318 Accounting of the United Nations, World Biodiversity Forum, and Post-2020 Global Biodiversity  
319 Framework. Furthermore, promoting the red-listing of endangered fungal species at the national and  
320 global levels is critical (FAO 2020; IUCN 2021). Fungi need active and specific inclusion in national  
321 and global conservation policies and strategies, not just passive and implicit protection.

322 Our study provides evidence that soil fungi may be highly vulnerable to global change, which needs  
323 to be considered when planning how to preserve these key organisms in a changing world. As with  
324 plants and animals, fungi appear to be environmentally sensitive due to the strong impacts that land  
325 cover change, low moisture, and high temperatures have on taxonomic and functional composition  
326 (Brinkmann et al. 2019; Makiola et al. 2019; this study). The endemism of fungi is highest in tropical  
327 forest biomes (Kier et al. 2009; this study), so conservation measures advocated for tropical plants and  
328 animals (Brooks et al. 2006; Barlow et al. 2018) are likely to conserve fungi. Tropical forests are  
329 under continued threat from deforestation and degradation driven by expanding agriculture, extractive  
330 industries, and infrastructural projects (Bebbington et al. 2018). Conservation of herbaceous wetlands,  
331 tropical rainforests and tropical woodlands is supported by our global fungal conservation priority  
332 map that accounts for endemism, vulnerability, and  $\gamma$ -diversity (**Fig. 10**). Additionally, given the  
333 importance of soil pH for soil microbial diversity and composition, it is essential to prioritize areas  
334 with high pedodiversity or mixed landscapes including bogs, various forest types, and grasslands. As  
335 a crucial measure, desertification and loss of soil organic matter needs to be controlled by reducing  
336 the conversion of primary forest to crops and pasture (Smith et al. 2020a). This is important not only  
337 to prevent land degradation processes from impairing bacterial and fungal diversity, but also to sustain  
338 the capacity of drylands to provide essential functions and services, such as soil fertility, carbon  
339 storage, and food production for more than one billion people (Sivakumar 2007; Delgado-Baquerizo  
340 et al. 2018).

341

## 342 **Conclusions**

343 In conclusion, soil fungi show strong endemism patterns, which differ by functional groups and are  
344 driven by both climatic and edaphic factors. Fungal groups also differ strongly in their relative  
345 vulnerability scores to global change, which peak in heavily populated tropical dryland areas.  
346 Unfortunately, these are the very areas most prone to further land degradation and desertification.  
347 Fungal endemism and vulnerability patterns only partly mirror those of vascular plants and animals,  
348 which may be ascribed to their more efficient dispersal mechanisms. Global conservation efforts  
349 should include fungal biodiversity surveys alongside assessments of soil health, below-aboveground  
350 feedbacks, and areas of highest conservation priority, to secure the protection of habitats. Even more,  
351 they should include the monitoring of regional fungal communities over time, to pick relevant

352 changes and to provide early warning signals of impending change. What we do not know, we cannot  
353 efficiently manage or protect.

354

## 355 **Methods**

### 356 *Datasets*

357 To study fungal endemism and vulnerability to global change, we combined data from the Global  
358 Soil Mycobiome consortium (GSMc) open dataset (Tedersoo et al. 2021b) with materials from five  
359 other global soil biological surveys (**Fig. 1**) – BIODESERT (Maestre et al. 2022), MUSGONET  
360 (including the natural sites in Delgado-Baquerizo et al. 2021), CLIMIFUN (Bastida et al. 2021),  
361 GlobalAM (Davison et al. 2021), GlobalWetlands (Bahram et al. 2022) as well as Sanger sequence  
362 data from soil-inhabiting fungi obtained from the UNITE database (Nilsson et al. 2019) covering  
363 GenBank. We obtained the DNA from all five surveys and performed new DNA metabarcoding  
364 analyses following the protocols outlined for the GSMc dataset (Tedersoo et al. 2021b).

365 All datasets comprised information on geographical coordinates and soil pH. Based on geographical  
366 coordinates, we assigned the following climatic and land cover metadata to the samples: i) CHELSA  
367 v2.1 bioclimatic variables for the period 1981-2010 (Karger et al., 2020), ii) CHELSA-TraCE21k  
368 v1.0. for the LGM (Karger et al. 2021), and iii) CHELSA v2.1 climate extrapolations for the year  
369 2070 following the RCP8.5 global warming scenario with SSP5 socioeconomic conditions and the  
370 GFDL-ESM4 global circulation model (Karger et al., 2020); iv) normalized difference vegetation  
371 index (NDVI; Filipponi et al. 2018); v) SoilGrids v.2 soil pH from 0-5 cm depth (Poggio et al., 2021);  
372 vi) land cover type using Copernicus classification v.3 (Buchhorn et al. 2020) for the year 2015; and  
373 vii) human footprint index based on the Land-Use Harmonization (LUH2; Hurtt et al., 2020) or the  
374 year 2015 and 2070 extrapolation. Based on original descriptions of vegetation (age, cover, relative  
375 abundance of species, fire history) or remote sensing data (Google Maps), samples were assigned to  
376 biomes (Olson et al. 2001) and land cover types. Based on Z-transformed differences in present and  
377 LGM bioclimatic variables, we calculated for each sample an averaged LGM climate change index.  
378 Further, for each sample we estimated the human footprint index as the cumulative sum of land-use  
379 state transitions, with the year 1960 used as a baseline.

380

### 381 *Bioinformatics*

382 To infer fungal species and taxonomy, we used a long-read sequencing approach involving the  
383 ribosomal RNA 18S gene V9 subregion, ITS1 spacer, 5.8S gene, and ITS2 spacer to enhance

384 taxonomic resolution and accuracy. We used degenerate, universal eukaryotic primers to cover as  
385 many divergent taxa within the fungi and micro-eukaryotes as possible (Tedersoo et al. 2021a). The  
386 amplicon samples were prepared in 82 PacBio SMRTbell sequencing libraries and sequenced on 48  
387 PacBio Sequel 8M SMRT cells. The obtained reads were quality-filtered, demultiplexed to samples,  
388 trimmed to include only the full-length ITS region, and clustered to operational taxonomic units  
389 (conditionally termed as species) at 98% sequence similarity, which roughly corresponds to species-  
390 level divergence. Taxonomy was assigned based on information from the 10 best BLASTn matches  
391 against the UNITE 9.1 beta dataset (<https://doi.org/10.15156/BIO/1444285>). The resulting species-by-  
392 sample matrices were manually checked library-wise for external and cross-contamination and rates  
393 of index switching artifacts. We excluded several samples for which we suspected contamination, and  
394 removed rare occurrences of dominant species using the following thresholds: abundances = 1 for  
395 species with total abundance of >99 and abundances = 2 for species with total abundance of >999.

396 Based on FungalTraits 1.3 (Pöhlme et al. 2020), species belonging to the kingdom Fungi were assigned  
397 to functional groups based on ecological or physiological characters: i) AM fungi (including all  
398 Glomeromycota but excluding all Endogonomycetes, because there is not enough information to  
399 distinguish AM species from free-living species); ii) EcM fungi (excluding dubious lineages); iii)  
400 non-EcM Agaricomycetes (mostly saprotrophic fungi with macroscopic fruiting bodies; iv) molds  
401 (including Mortierellales, Mucorales, Umbelopsidales, and Aspergillaceae and Trichocomaceae of  
402 Eurotiales and Trichoderma of Hypocreales); v) putative pathogens (including plant, animal and  
403 fungal pathogens as primary or secondary lifestyles); vi) OHPs (excluding Mortierellales); vii) yeasts  
404 (excluding dimorphic yeasts); and viii) other unicellular (non-yeast) fungi (including chytrids, aphids,  
405 rozellids, and other early-diverging fungal lineages). Other groups such as lichen-forming fungi were  
406 not considered, owing to their relative infrequency in soil across samples and ecoregions. Among  
407 these groups, mostly non-EcM Agaricomycetes and EcM fungi comprise many red-listed species of  
408 conspicuous conch-shaped, resupinate, or stipitate fruiting bodies and are hence considered to be of  
409 relatively higher conservation interest (Cao et al. 2021; IUCN 2021).

410

#### 411 *Fungal diversity*

412 To assess patterns in global fungal  $\alpha$ -diversity, we first calculated the residuals of logarithmically-  
413 transformed fungal richness and richness of major functional groups by performing linear regression  
414 against the logarithm of sequencing depth. We also compared other approaches such as residuals from  
415 untransformed richness against square-root-transformed and log-transformed sequencing depth  
416 (Tedersoo et al. 2014), exclusion of singletons, Shannon index of diversity, traditional rarefaction  
417 (depth, 500 reads), and SRS-rarefaction (Beule & Karlovsky 2020) to 500 (minimum) or 3894  
418 (median) reads (**Fig. 2**). Because the approach including singletons and log-log transformation for

419 selecting residuals resulted in best-supported models (**Fig. 2**), we chose this approach for further  
420 analyses. Because the sampling protocols differed in sampling area size, number of subsamples and  
421 DNA extraction protocols, we included only the GSMc dataset in analyses of fungal richness and  
422 composition. The GSMc dataset furthermore featured information about vegetation (age, proportion  
423 of dominant plant taxa and mycorrhiza types, fire history) soil properties (C, N, P, K, Ca, Mg  
424 concentration), and sampling date. Based on geographical coordinates and sampling dates, we  
425 calculated geographic and temporal eigenvectors using the *adespatial* package of R (Dray et al. 2018).  
426 Phylogenetic eigenvectors were calculated for woody plant species composition by mapping the taxa  
427 to a multigene vascular plant phylogram (Qian & Jin 2016).

428 Because of metadata availability and comparability, we exclusively used the GSMc dataset (3200  
429 composite samples by 722,682 species) to estimate the best predictors of fungal  $\alpha$ -diversity and  
430 composition and to update global fungal diversity distribution maps. We first calculated the residuals  
431 of logarithmically-transformed fungal richness and richness of major functional groups by performing  
432 linear regression against the logarithm of sequencing depth. Besides richness residuals and Shannon  
433 index of diversity, we calculated fungal phylogenetic diversity (PD), mean phylogenetic distance  
434 (MPD), and mean neighbor taxonomic distance (MNTD) indices based on a classification tree  
435 (Tedersoo et al. 2018) using the *PhyloMeasures* package of R (Tsirogianis & Sandel 2016). For  
436 predictors, we included biome and continent (dummy variables), bioclimatic, edaphic, and vegetation-  
437 related variables, as well as eigenvectors of woody plant phylogenetic composition, spatial and  
438 temporal distance. Using random forest, we retrieved 20 candidate variables for GLM modeling. In  
439 GLM modeling, we included quadratic terms to account for non-linearity. To avoid an excessive  
440 number of predictors, only significant variables ( $P < 0.001$ ;  $R^2 > 0.020$ ) were kept in the final models.  
441 We also performed additional correlation analyses to illustrate the latitudinal gradient of  $\alpha$ -diversity  
442 and  $\gamma$ -diversity. For generating fungal diversity maps, we performed additional analyses using  
443 bioclimatic variables, database  $pH_{H2O(0-5\text{ cm})}$ , human footprint index and Copernicus land use categories  
444 and their interactions with continuous predictors as described for vulnerability maps. The GSMc  
445 dataset-based  $\alpha$ -diversity analyses were validated by performing similar analyses using other datasets.  
446 Richness residuals were calculated separately for these data and all datasets were subjected to model  
447 selection for soil pH and bioclimatic variables, because information about other predictors was  
448 inconsistent. We also modeled various versions of soil pH including the original measurements of  
449  $pH_{KCl}$  as well as  $pH_{H2O}$  extrapolations for soil depths of 0-5 cm, 0-30 cm, and 15-30 cm. Since the  
450  $pH_{KCl}$  fit significantly better into global models (**Fig. 2B**) and  $pH_{H2O}$  extrapolations were missing for  
451 smaller islands and Antarctic habitats, we used  $pH_{KCl}$  in subsequent analyses.

452 For  $\gamma$ -diversity, logarithmically-transformed cumulative ecoregion (see below) species richness was  
453 subjected to model selection against the logarithmically-transformed number of samples and  
454 sequencing depth to calculate residual richness. Residual richness and endemism indices of all fungi

455 and functional groups were subjected to random forest machine learning analysis to pre-select ten  
456 most important variables for GLM.

457

#### 458 *Endemicity*

459 To infer endemicity patterns in fungi, samples (including data obtained from UNITE, covering  
460 International Nucleotide Sequence Databases entries) were assigned to ecological regions (Olson et al.  
461 2001) based on their geographical coordinates, allowing a 10-km of buffer zone between a terrestrial  
462 ecological region and water (due to low resolution of the map layers in shore areas). Based on  
463 climatic and floristic similarities, the ecological regions were further aggregated into larger areas or  
464 split into smaller, geographically distinct units, which we refer to as ecoregions (**Fig. 7**). Each of 174  
465 ecoregions comprised 1 to 45 soil samples, with surplus samples excluded randomly. Five indices of  
466 endemism – viz., the number of endemic species (weight = 16.7%), proportion of endemic species  
467 (weight = 16.7%), mean maximum geographical range of taxa (weight = 33.3%), Jaccard index  
468 (weight = 16.7%), and beta-sim index (weight = 16.7%) – were selected for calculating the averaged  
469 endemicity index based on the community matrix (Crisp et al. 2001; Villéger & Brosse 2012; **Box 1**).  
470 The former two and latter two indices reflect similar aspects of endemicity and were therefore  
471 downweighted. To account for differences in sampling intensity, we calculated residuals for the  
472 numbers of all species and endemic species by regressing these against the logarithmically-  
473 transformed number of samples and sequencing depth.

474 Of the indices used, only the number and proportion of endemic taxa were significantly positively  
475 correlated with species richness (all fungi:  $r=0.707$  and  $r=0.212$ , respectively), whereas others had no  
476 significant correlation. Furthermore, species richness was not included among the best predictors of  
477 averaged endemicity, indicating that these metrics are independent. Endemicity indices were  
478 calculated using the betapart package v.1.5.4 (Baselga & Orme 2012) of R v.4.1.10 (R Core Team  
479 2022). Endemicity indices of all fungi and functional groups were subjected to random forest machine  
480 learning analysis to pre-select the ten most important variables for GLM. We used the variance (as  
481 coefficient of variation) and averaged values of bioclimatic variables, area, latitude, longitude,  
482 altitude, and soil pH as well as continents (dummy variables) to explain endemicity. GLMs were fitted  
483 using second-order polynomial terms for continuous variables. Only significant variables ( $P<0.050$ ;  
484  $r^2>0.020$ ) were kept in the final models. Based on the predictions revealed by GLMs, endemicity  
485 maps were constructed using the sf v.1.0-5 (Pebesma 2018) package of R.

486

487

488 *Global change vulnerability*

489 The vulnerability of soil fungal groups was estimated relative to three global change drivers – heat  
490 (maximum monthly temperature), drought (negative of inverse hyperbolic sine-transformed  
491 precipitation in the driest quarter), and land cover change – for the year 2070 (relative to 2015  
492 baseline) using the community-mean percentile vulnerability index ( $V_2$ ; Smith et al. 2020b). This  
493 index is based on averaging percentiles of all species at a given global change driver value.

$$V_{2i} = \left( \frac{\sum_{j=1}^n a_{ij} F_j(x_i)}{\sum_{j=1}^n a_{ij}} \right) \times 100$$

494

495 where  $a_{ij}$  is the presence (0 or 1) of species  $j$  in site  $i$ ,  $F_j(x_i)$  is the percentile of species  $j$  given site  
496 parameter value  $x_i$ ,  $x_i$  is the parameter value of site  $i$ , and  $n$  is the total number of species observed.

497 Precipitation in the driest quarter was selected as a proxy for drought, because bioclimatic variables  
498 cover larger areas (including islands) and offer greater resolution compared with other measures of  
499 soil water content and indicators of drought. The vulnerability scores were calculated for each soil  
500 sample using `vuln v.0.0.05` (Smith et al. 2020b) package of R. We also constructed the average  
501 vulnerability score by equally weighting all components. The vulnerability scores were unrelated to  
502 sequencing depth and sample size. We performed a similar random forest and GLM modeling  
503 exercise for determining the main predictors of vulnerability as described above, but allowed  
504 interaction terms between categorical and continuous predictors and used a more relaxed threshold for  
505 keeping variables in the model ( $P < 0.001$ ;  $R^2 > 0.01$ ) due to greater sample size. To construct  
506 vulnerability maps we used a regression-kriging approach (Hengl & MacMillan 2019). To predict  
507 vulnerability scores for each global driver and estimate their prediction uncertainty, thin plate splines  
508 (basis dimensionality = 3) were fitted using a generalized additive model (GAM) with `mgcv v.1.8-38`  
509 (Wood 2011) package. To incorporate the spatial autocorrelation signal, we calculated residuals at the  
510 sampling sites and used inverse distance weighting (IDW) to interpolate residuals beyond the  
511 sampling sites. To obtain final vulnerability predictions, interpolated residuals were added to the  
512 results based on the predicted regression part. By using the relative vulnerability values, we also  
513 prepared the map of fungal vulnerability ascribed to each of the three components. Vulnerability maps  
514 were visualized using the `raster v.3.5-9` (Hijmans 2021) package of R.

515 The maps for conservation priorities were calculated for all fungi using sampling points used in  
516 vulnerability analyses, except points corresponding to cropland and urban and village land cover. For  
517 each sampling point, the respective average endemism,  $\gamma$ -diversity, and vulnerability scores were z-  
518 transformed, followed by adding a constant (5, to exclude negative values), multiplied (to downweigh

519 areas with any low values), and used in a regression-kriging approach (**Table 3**) as described for  
520 vulnerability.

521 Based on methods comparison, we conclude that inclusion of singletons may increase richness model  
522 performance at relatively low sequencing depth in high-quality, third-generation sequencing datasets.  
523 Furthermore, residuals of log-transformed richness against log-transformed sequencing depth yields  
524 significantly better model estimates compared with most other standardization methods. Richness data  
525 from studies with different sampling designs must not be pooled in a common analysis unless the  
526 factor “study” or sampling attributes (e.g. number of subsamples, volume of samples) are accounted  
527 for. Use of original soil pH data strongly outperforms extrapolated data; therefore, soil pH  
528 extrapolations should not be used for testing relative effects of edaphic and climatic and other  
529 properties. This probably applies to other edaphic and vegetation-related values that greatly vary on a  
530 local scale.

531

## 532 **Acknowledgements**

533 The bulk of the funding is derived from the Estonian Science Foundation (grants PRG632, PRG1170,  
534 PSG136, MOBTP198), Norway-Baltic financial mechanism (grant EMP442) and Novo Nordisk  
535 Fonden (NNF20OC0059948). LT, VM, AZ, MB, NAS, AA, UK, and KA designed the study; VM,  
536 LT, AZ, MB, NH-D, SA, and OP analyzed data; LT, MD-B, FTM, JP, MÖ, MM, MZ, ME, and ÜM  
537 contributed DNA extracts from global surveys; other authors contributed materials, data, and/or  
538 chemical analyses; LT wrote the first draft and all authors contributed to the writing of the article. The  
539 authors confirm that there are no competing interests. Data for this paper have been deposited to the  
540 PlutoF data repository (GSMc data: <https://doi.org/10.15156/BIO/2263453>). Representative sequences  
541 of identical reads per sample are available from the UNITE database. The scripts used for the  
542 bioinformatic analysis are available at GitHub: [https://github.com/Mycology-Microbiology-  
543 Center/GSMc](https://github.com/Mycology-Microbiology-Center/GSMc)

544

## 545 **References**

546

- 547 Aslani F, Geisen S, Ning D, Tedersoo L, Bahram M. 2021. Towards revealing the global diversity and  
548 community assembly of soil eukaryotes. *Ecology Letters* 25: 65-76.
- 549 Bahram M, Kõljalg U, Courty P-E, Diedhiou A, Kjøller R, Põlme S, Ryberg M, Veldre V, Tedersoo  
550 L. 2013. The distance-decay of similarity in communities of ectomycorrhizal fungi in different  
551 ecosystems and scales. *Journal of Ecology* 101: 1335–1344.
- 552 Bahram M, Espenberg M, Pärn J, Lehtovirta-Morley L, Anslan S, Kasak K, Kõljalg U, Liira J,  
553 Maddison M, Moora M, Niinemets Ü, Öpik M, Pärtel M, Soosaar K, Zobel M, Hildebrand F,  
554 Tedersoo L, Mander Ü. 2022. Structure and function of the soil microbiome underlying N<sub>2</sub>O  
555 emissions from global wetlands. *Nature Communications* 13:1430.
- 556 Barcenas-Moreno GE, Gomez-Brandon MA, Rousk J, Bååth E. 2009. Adaptation of soil microbial  
557 communities to temperature: comparison of fungi and bacteria in a laboratory experiment. *Global  
558 Change Biology* 15: 2950-2957.
- 559 Barlow J, França F, Gardner TA, Hicks CC, Lennox GD, Berenguer E, Castello L, Economo EP,  
560 Ferreira J, Guénard B, Leal CG, Isaac V, Lees A, Parr C, Wilson S, Young P, Graham N. 2018. The  
561 future of hyperdiverse tropical ecosystems. *Nature* 559: 517-526.
- 562 Baselga A, Orme CDL. 2012. betapart: an R package for the study of beta diversity. *Methods in  
563 Ecology and Evolution* 3: 808-812.



- 564 Bastida F, Eldridge DJ, García C, Png GK, Bardgett RD, Delgado-Baquerizo M. 2021. Soil microbial  
565 diversity–biomass relationships are driven by soil carbon content across global biomes. *The ISME*  
566 *Journal* 15: 2081–2091.
- 567 Bebbington AJ, Bebbington DH, Sauls LA, Rogan J, Agrawal S, Gamboa C, Imhof A, Johnson K,  
568 Rosa H, Royo A, Toumbourou T. 2018. Resource extraction and infrastructure threaten forest cover  
569 and community rights. *Proceedings of the National Academy of Sciences* 115: 13164-13173.
- 570 Beule L, Karlovsky P. 2020. Improved normalization of species count data in ecology by scaling with  
571 ranked subsampling (SRS): application to microbial communities. *PeerJ* 8:e9593.
- 572 Brinkmann N, Schneider D, Sahner J, Ballauff J, Edy N, Barus H, Irawan B, Budi SW, Qaim M,  
573 Daniel R, Polle A. 2019. Intensive tropical land use massively shifts soil fungal communities.  
574 *Scientific Reports* 9:3403.
- 575 Brook BW, Sodhi NS, Bradshaw CJ. 2008. Synergies among extinction drivers under global change.  
576 *Trends in Ecology & Evolution* 23: 453-460.
- 577 Brooks TM, Mittermeier RA, Da Fonseca GA, Gerlach J, Hoffmann M, Lamoreux JF, Mittermeier  
578 CG, Pilgrim JD, Rodrigues AS. 2006. Global biodiversity conservation priorities. *Science* 313: 58-  
579 61.
- 580 Brown JH. 2013. Why are there so many species in the tropics? *Journal of Biogeography* 41: 8-22.
- 581 Buchhorn M, Lesiv M, Tsendbazar NE, Herold M, Bertels L, Smets B. 2020. Copernicus global land  
582 cover layers - collection 2. *Remote Sensing* 12:1044.
- 583 Cameron EK, Martins IS, Lavelle P, Mathieu J, Tedersoo L, Bahram M, Gottschall F, Guerra CA,  
584 Hines J, Patoine G, Siebert J. 2019. Global mismatches in aboveground and belowground  
585 biodiversity. *Conservation Biology* 33: 1187-1192.
- 586 Cao Y, Wu G, Yu D. 2021. Include macrofungi in biodiversity targets. *Science* 372: 1160-1160.
- 587 Chen L, Swenson NG, Ji N, Mi X, Ren H, Guo L, Ma K. 2019. Differential soil fungus accumulation  
588 and density dependence of trees in a subtropical forest. *Science* 366: 124-128.
- 589 Crisp MD, Laffan S, Linder HP, Monro A. 2001. Endemism in the Australian flora. *Journal of*  
590 *Biogeography* 28: 183-198.
- 591 Crowther TW, Van den Hoogen J, Wan J, Mayes MA, Keiser AD, Mo L, Averill C, Maynard DS.  
592 2019. The global soil community and its influence on biogeochemistry. *Science* 365:eaav0550.
- 593 Davison J, Moora M, Semchenko M, Adenan SB, Ahmed T, Akhmetzhanova AA, Alatalo JM, Al-  
594 Quraishy S, Andriyanova E, Anslan S. 2021. Temperature and pH define the realised niche space of  
595 arbuscular mycorrhizal fungi. *New Phytologist* 231: 763-776.
- 596 Davison J, Moora M, Öpik M, Adholeya A, Ainsaar L, Ba A, Burla S, Diedhiou AG, Hiiesalu I,  
597 Jairus T, Johnson NC, Kane A, Koorem K, Kochar M, Ndiaye C, Pärtel M, Reier Ü, Saks Ü, Singh  
598 R, Vasar M, Zobel M. 2015. Global assessment of arbuscular mycorrhizal fungus diversity reveals  
599 very low endemism. *Science* 349: 970-973.
- 600 de Vries FT, Griffiths RI, Bailey M, Craig H, Girlanda M, Gweon HS, Hallin S, Kaisermann A, Keith  
601 AM, Kretzschmar M, Lemanceau P, Bardgett RD. 2018. Soil bacterial networks are less stable  
602 under drought than fungal networks. *Nature Communications* 9:3033.
- 603 Delgado-Baquerizo M, Eldridge DJ, Liu YR, Sokoya B, Wang JT, Hu HW, He JZ, Bastida F, Moreno  
604 JL, Bamigboye AR, Blanco-Pastor JL, Singh BK. 2021. Global homogenization of the structure and  
605 function in the soil microbiome of urban greenspaces. *Science Advances* 7:eabg5809.
- 606 Delgado-Baquerizo M, Eldridge DJ, Ochoa V, Gozalo B, Singh BK, Maestre FT. 2017. Soil microbial  
607 communities drive the resistance of ecosystem multifunctionality to global change in drylands  
608 across the globe. *Ecology Letters* 20: 1295-1305.
- 609 Delgado-Baquerizo M, Eldridge DJ, Travers SK, Val J, Oliver I, Bissett A. 2018. Effects of climate  
610 legacies on above-and below-ground community assembly. *Global Change Biology* 24: 4330–4339.
- 611 Dray S, Blanchet G, Borcard D, Guenard G, Jombart T, Larocque G, Legendre P, Madi N, Wagner  
612 HH, Dray MS. 2018. Package ‘adespatial’.  
613 <https://cran.microsoft.com/web/packages/adespatial/adespatial.pdf>
- 614 Ducarme F, Luque GM, Courchamp F. 2013. What are “charismatic species” for conservation  
615 biologists. *BioSciences Master Reviews* 10: 1-8.
- 616 Egidi E, Delgado-Baquerizo M, Plett JM, Wang J, Eldridge DJ, Bardgett RD, Maestre FT, Singh BK.  
617 2019. A few Ascomycota taxa dominate soil fungal communities worldwide. *Nature*  
618 *Communications* 10:2369.

- 619 FAO. 2020. State of knowledge of soil biodiversity: status, challenges and potentialities. FAO, Rome.  
620 <https://doi.org/10.4060/cb1928en>
- 621 Filippini F, Valentini E, Nguyen Xuan A, Guerra CA, Wolf F, Andrzejak M, Taramelli A. 2018.  
622 Global MODIS fraction of green vegetation cover for monitoring abrupt and gradual vegetation  
623 changes. *Remote Sensing* 10:653.
- 624 Finderup Nielsen T, Sand-Jensen K, Dornelas M, Bruun HH. 2019. More is less: net gain in species  
625 richness, but biotic homogenization over 140 years. *Ecology Letters* 22: 1650-1657.
- 626 Godoy R, Marin C. 2019. Mycorrhizal studies in temperate rainforests of Southern Chile. In: Pagano  
627 MC, Lugo MA (eds). *Mycorrhizal Fungi in South America*. (pp. 315-341). Springer, Cham.
- 628 Golan JJ, Pringle A. 2017. Long-distance dispersal of fungi. *Microbiology Spectrum* 5: 1-24.
- 629 Gonçalves SC, Haelewaters D, Furci G, Mueller GM. 2021. Include all fungi in biodiversity goals.  
630 *Science* 373: 403.
- 631 Guerra CA, Bardgett RD, Caon L, Crowther TW, Delgado-Baquerizo M, Montanarella L, Navarro  
632 LM, Orgiazzi A, Singh BK. 2021a. Tracking, targeting, and conserving soil biodiversity. *Science*  
633 371: 239-241.
- 634 Guerra CA, Delgado-Baquerizo M, Duarte E, Marigliano O, Görgen C, Maestre FT, Eisenhauer N.  
635 2021b. Global projections of the soil microbiome in the Anthropocene. *Global Ecology and*  
636 *Biogeography* 30: 987-999.
- 637 Hawksworth DL, Lücking R. 2017. Fungal diversity revisited: 2.2 to 3.8 million species.  
638 *Microbiology Spectrum* 1: 79-95.
- 639 Hengl T, MacMillan RA. 2019. Predictive Soil Mapping with R. OpenGeoHub Foundation,  
640 Wageningen. [www.soilmapper.org](http://www.soilmapper.org).
- 641 Hijmans RJ. 2021. raster: Geographic Data Analysis and Modeling. R package version 3.5-9.  
642 <https://CRAN.R-project.org/package=raster>
- 643 Hurtt GC, Chini L, Sahajpal R, Frolking S, Bodirsky BL, Calvin K, Doelman JC, Fisk J, Fujimori S,  
644 Klein Goldewijk K, Hasegawa T. 2020. Harmonization of global land use change and management  
645 for the period 850–2100 (LUH2) for CMIP6. *Geoscientific Model Development* 13: 5425-5464.
- 646 IUCN 2021. The IUCN Red List of Threatened Species. Version 2021-2. International Union for  
647 Conservation of Nature, Gland.
- 648 Karger DN, Nobis MP, Normand S, Graham CH, Zimmermann NE. 2021. CHELSA-TraCE21k v1. 0.  
649 Downscaled transient temperature and precipitation data since the last glacial maximum. *Climate of*  
650 *the Past Discussions* 2021:30.
- 651 Karger DN, Schmatz DR, Dettling G, Zimmermann NE. 2020. High-resolution monthly precipitation  
652 and temperature time series from 2006 to 2100. *Scientific Data* 7:248.
- 653 Kennedy PG, Matheny PB, Ryberg KM, Henkel TW, Uehling JK, Smith ME. 2012. Scaling up:  
654 examining the macroecology of ectomycorrhizal fungi. *Molecular Ecology* 21: 4151-4154.
- 655 Kennedy PG, Walker JKM, Bogar LM. 2015. Interspecific mycorrhizal networks and non-networking  
656 hosts: exploring the ecology of host genus *Alnus*. *Ecological Studies* 224: 227-254.
- 657 Kier G, Kreft H, Lee TM, Jetz W, Ibisch PL, Nowicki C, Mutke J, Barthlott W. 2009. A global  
658 assessment of endemism and species richness across island and mainland regions. *Proceedings of*  
659 *the National Academy of Sciences USA* 106: 9322-9327.
- 660 Kinlock NL, Prowant L, Herstoff EM, Foley CM, Akin-Fajiyiye M, Bender N, Umarani M, Ryu HY,  
661 Şen B, Gurevitch J. 2018. Explaining global variation in the latitudinal diversity gradient: Meta-  
662 analysis confirms known patterns and uncovers new ones. *Global Ecology and Biogeography* 27:  
663 125-141.
- 664 Le Provost G, Thiele J, Westphal C, Penone C, Allan E, Neyret M, Van Der Plas F, Ayasse M,  
665 Bardgett RD, Birkhofer K, Boch S. 2021. Contrasting responses of above-and belowground  
666 diversity to multiple components of land-use intensity. *Nature Communications* 12:3918.
- 667 Makiola A, Dickie IA, Holdaway RJ, Wood JR, Orwin KH, Glare TR. 2019. Land use is a  
668 determinant of plant pathogen alpha-but not beta-diversity. *Molecular Ecology* 28: 3786-98.
- 669 Maestre FT, Eldridge DJ, Gross N, Le Bagousse-Pinguet Y, Saiz H, Gozalo B, Ochoa V, Gaitán JJ.  
670 2022. The BIODESERT survey: Assessing the impacts of grazing on the structure and functioning  
671 of global drylands. *Web Ecology*, doi: 10.5194/we-21-1-2021.
- 672 Malcolm GM, Lopez-Gutierrez JC, Koide RT, Eissenstat DM. 2008. Acclimation to temperature and  
673 temperature sensitivity of metabolism by ectomycorrhizal fungi. *Global Change Biology* 14: 1169-  
674 1180.

- 675 Maynard DS, Bradford MA, Covey KR, Lindner D, Glaeser J, Talbert DA, Tinker PJ, Walker DM,  
676 Crowther TW. 2019. Consistent trade-offs in fungal trait expression across broad spatial scales.  
677 *Nature Microbiology* 4:846.
- 678 Misiak M, Goodall-Copestake WP, Sparks TH, Worland MR, Boddy L, Magan N, Convey P,  
679 Hopkins DW, Newsham KK. 2021. Inhibitory effects of climate change on the growth and  
680 extracellular enzyme activities of a widespread Antarctic soil fungus. *Global Change Biology* 27:  
681 1111-1125.
- 682 Newsham KK, Hopkins DW, Carvalhais LC, Fretwell PT, Rushton SP, O'Donnell AG, Dennis PG.  
683 2016. Relationship between soil fungal diversity and temperature in the maritime Antarctic. *Nature*  
684 *Climate Change* 6: 182-186.
- 685 Nilsson RH, Larsson K-H, Taylor AFS, Bengtsson-Palme J, Jeppesen TS, Schigel D, Kennedy P,  
686 Picard K, Glöckner FO, Tedersoo L, Saar I, Kõljalg U, Abarenkov K. 2019. The UNITE database  
687 for molecular identification of fungi: handling dark taxa and parallel taxonomic classifications.  
688 *Nucleic Acids Research* 47: D259-D264.
- 689 Pebesma E. 2018. Simple Features for R: Standardized Support for Spatial Vector Data. *The R*  
690 *Journal* 10: 439-446.
- 691 Oliverio AM, Geisen S, Delgado-Baquerizo M, Maestre FT, Turner BL, Fierer N. 2020. The global-  
692 scale distributions of soil protists and their contributions to belowground systems. *Science Advances*  
693 6:eaax8787.
- 694 Olson DM, Dinerstein E, Wikramanayake ED, Burgess ND, Powell GWN, Underwood EC, Damico  
695 JA, Itoua I, Strand HE, Morrison JC, Loucks CJ, Allnutt TF, Ricketts TH, Kura Y, Lamoreux JF,  
696 Wettengel WW, Hedao P, Kassem KR. 2001. Terrestrial ecoregions of the World: a new map of life  
697 on earth. *Bioscience* 51: 933-938.
- 698 Poggio L, de Sousa LM, Batjes NH, Heuvelink G, Kempen B, Ribeiro E, Rossiter D. 2021. SoilGrids  
699 2.0: producing soil information for the globe with quantified spatial uncertainty. *Soil* 7: 217-240.
- 700 Pöhlme S, Abarenkov K, Nilsson RH, Lindahl BD, Clemmensen KE, Kausarud H, Nguyen N, Kjølner  
701 R, Bates ST, Baldrian P. FungalTraits: a user-friendly traits database of fungi and fungus-like  
702 stramenopiles. *Fungal Diversity* 105: 1–16.
- 703 Pöhlme S, Bahram M, Jacquemyn H, Kennedy P, Kohout P, Moora M, Oja J, Öpik M, Pecoraro L.  
704 2018. Host preference and network properties in biotrophic plant–fungal associations. *New*  
705 *Phytologist* 217: 1230–1239.
- 706 Potapov AM, Guerra CA, van den Hoogen J, Babenko A, Bellini BC, Berg MP, Chown SL,  
707 Deharveng L, Kova L, Kuznetsova NA, Ponge JF. 2022. Globally invariant metabolism but density-  
708 diversity mismatch in springtails. *bioRxiv* 2022:475345.
- 709 Qian H, Jin Y. 2016. An updated megaphylogeny of plants, a tool for generating plant phylogenies  
710 and an analysis of phylogenetic community structure. *Journal of Plant Ecology* 9: 233-239.
- 711 R Core Team. 2021. R: a language and environment for statistical computing. [http://www.R-](http://www.R-project.org/)  
712 [project.org/](http://www.R-project.org/).
- 713 Rillig MC, Ryo M, Lehmann A, Aguilar-Trigueros CA, Buchert S, Wulf A, Iwasaki A, Roy J, Yang  
714 G. 2019. The role of multiple global change factors in driving soil functions and microbial  
715 biodiversity. *Science* 366: 886-890.
- 716 Rodriguez-Ramos JC, Cale JA, Cahill Jr, JF, Simard SW, Karst J, Erbilgin N. 2021. Changes in soil  
717 fungal community composition depend on functional group and forest disturbance type. *New*  
718 *Phytologist* 229: 1105-1117.
- 719 Romero-Olivares AL, Allison SD, Treseder KK. 2017. Soil microbes and their response to  
720 experimental warming over time: a meta-analysis of field studies. *Soil Biology and Biochemistry*  
721 107: 32-40.
- 722 Rosauer DF, Jetz W. 2015. Phylogenetic endemism in terrestrial mammals. *Global Ecology and*  
723 *Biogeography* 24: 168-179.
- 724 Sanchez-Ramirez S, Etienne RS, Moncalvo J-M. 2015. High speciation rate at temperate latitudes  
725 explains unusual diversity gradients in a clade of ectomycorrhizal fungi. *Evolution* 8: 2196–2209.
- 726 Sandel B, Weigelt P, Kreft H, Keppel G, van der Sande MT, Levin S, Smith S, Craven D, Knight TM.  
727 2020. Current climate, isolation and history drive global patterns of tree phylogenetic endemism.  
728 *Global Ecology and Biogeography* 29: 4-15.

- 729 Schmidt PA, Schmitt I, Otte J, Bandow C, Römbke J, Bálint M, Rolshausen G. 2017. Season-long  
730 experimental drought alters fungal community composition but not diversity in a grassland soil.  
731 *Microbial Ecology* 75: 468-478.
- 732 Schulte to Bühne H, Tobias JA, Durant SM, Pettoelli N. 2020. Improving predictions of climate  
733 change–land use change interactions. *Trends in Ecology & Evolution* 36: 29-38
- 734 Sivakumar MV. 2007. Interactions between climate and desertification. *Agricultural and Forest*  
735 *Meteorology* 142: 143-155.
- 736 Smith P, Calvin K, Nkem J, Campbell D, Cherubini F, Grassi G, Korotkov V, Le Hoang A, Lwasa S,  
737 McElwee P, Nkonya E. 2020a. Which practices co-deliver food security, climate change mitigation  
738 and adaptation, and combat land degradation and desertification? *Global Change Biology* 26: 1532-  
739 1575.
- 740 Smith RJ, Jovan S, McCune B. 2020b. Climatic niche limits and community-level vulnerability of  
741 obligate symbioses. *Journal of Biogeography* 47: 382-395.
- 742 Soinenen J, Korhonen JJ, Luoto M. 2013. Stochastic species distributions are driven by organism size.  
743 *Ecology* 94: 660–670.
- 744 Stein A, Gerstner K, Kreft H. 2014. Environmental heterogeneity as a universal driver of species  
745 richness across taxa, biomes and spatial scales. *Ecology Letters* 17: 866-880.
- 746 Talbot JM, Bruns TD, Taylor JW, Smith DP, Branco S, Glassman SI, Erlandson S, Vilgalys R, Laio  
747 H-L, Smith ME, Peay KG. 2014. Endemism and functional convergence across the North American  
748 mycobiome. *Proceedings of the National Academy of Sciences USA* 111: 6341–6346.
- 749 Tedersoo L, Albertsen M, Anslan S, Callahan B. 2021a. Perspectives and benefits of high-throughput  
750 long-read sequencing in microbial ecology. *Applied and Environmental Microbiology* 87:e00626-  
751 21.
- 752 Tedersoo L, Bahram M, Pöhlme S, Kõljalg U, Yorou NS, Wijesundera R, Villarreal-Ruiz L, Vasco-  
753 Palacios A, Quang Thu P, Suija A, Smith ME, Sharp C, Saluveer E, Saitta A, Ratkowsky D, Pritsch  
754 K, Riit T, Pöldmaa K, Piepenbring M, Phosri C, Peterson M, Parts K, Pärtel K, Otsing E, Nouhra E,  
755 Njouonkou AL, Nilsson RH, Morgado LN, Mayor J, May TW, Kohout P, Hosaka K, Hiiesalu I,  
756 Henkel TW, Harend H, Guo L, Greslebin A, Grelet G, Geml J, Gates G, Dunstan W, Dunk C,  
757 Drenkhan R, Dearnaley J, De Kesel A, Dang T, Chen X, Buegger F, Brearley FQ, Bonito G, Anslan  
758 S, Abell S, Abarenkov K. 2014. Global diversity and geography of soil fungi. *Science* 346: 1078.
- 759 Tedersoo L, Mikryukov V, Anslan S, Bahram M, Khalid AN, Corrales A, Agan A, Vasco-Palacios  
760 AM, Saitta A, Antonelli A, Rinaldi AC. 2021b. The Global Soil Mycobiome consortium dataset for  
761 boosting fungal diversity research. *Fungal Diversity* 111: 573-588.
- 762 Tedersoo L, Sánchez-Ramírez S, Kõljalg U, Bahram M, Döring M, Schigel D, May T, Ryberg M,  
763 Abarenkov K. 2018. High-level classification of the Fungi and a tool for evolutionary ecological  
764 analyses. *Fungal Diversity* 90: 135–159.
- 765 Tsirogiannis C, Sandel B. 2016. PhyloMeasures: a package for computing phylogenetic biodiversity  
766 measures and their statistical moments. *Ecography* 39: 709-714.
- 767 Vazquez DP, Stevens RD. 2004. The latitudinal gradient in niche breadth: concepts and evidence. *The*  
768 *American Naturalist* 164: E1-E9.
- 769 Vetrovsky T, Kohout P, Kopecký M, Machac A, Man M, Bahnmann BD, Brabcová V, Choi J,  
770 Meszárošová L, Human ZR, Lepinay C, Baldrian P. 2019. A meta-analysis of global fungal  
771 distribution reveals climate-driven patterns. *Nature Communications* 10: 1-9.
- 772 Villéger S, Brosse S. 2012. Measuring changes in taxonomic dissimilarity following species  
773 introductions and extirpations. *Ecological Indicators* 18: 552-558.
- 774 Wardle DA, Lindahl BD. 2014. Disentangling global soil fungal diversity. *Science* 346: 1052-1053.
- 775 Warren R, VanDerWal J, Price J, Welbergen JA, Atkinson I, Ramirez-Villegas J, Osborn TJ, Jarvis A,  
776 Shoo LP, Williams SE, Lowe J. 2013. Quantifying the benefit of early climate change mitigation in  
777 avoiding biodiversity loss. *Nature Climate Change* 3: 678-682.
- 778 Watson JE, Iwamura T, Butt N. 2013. Mapping vulnerability and conservation adaptation strategies  
779 under climate change. *Nature Climate Change* 3: 989-994.
- 780 Wood SN. 2011. Fast stable restricted maximum likelihood and marginal likelihood estimation of  
781 semiparametric generalized linear models. *Journal of the Royal Statistical Society B* 73: 3-36.

782

783

784 **Figures**

785

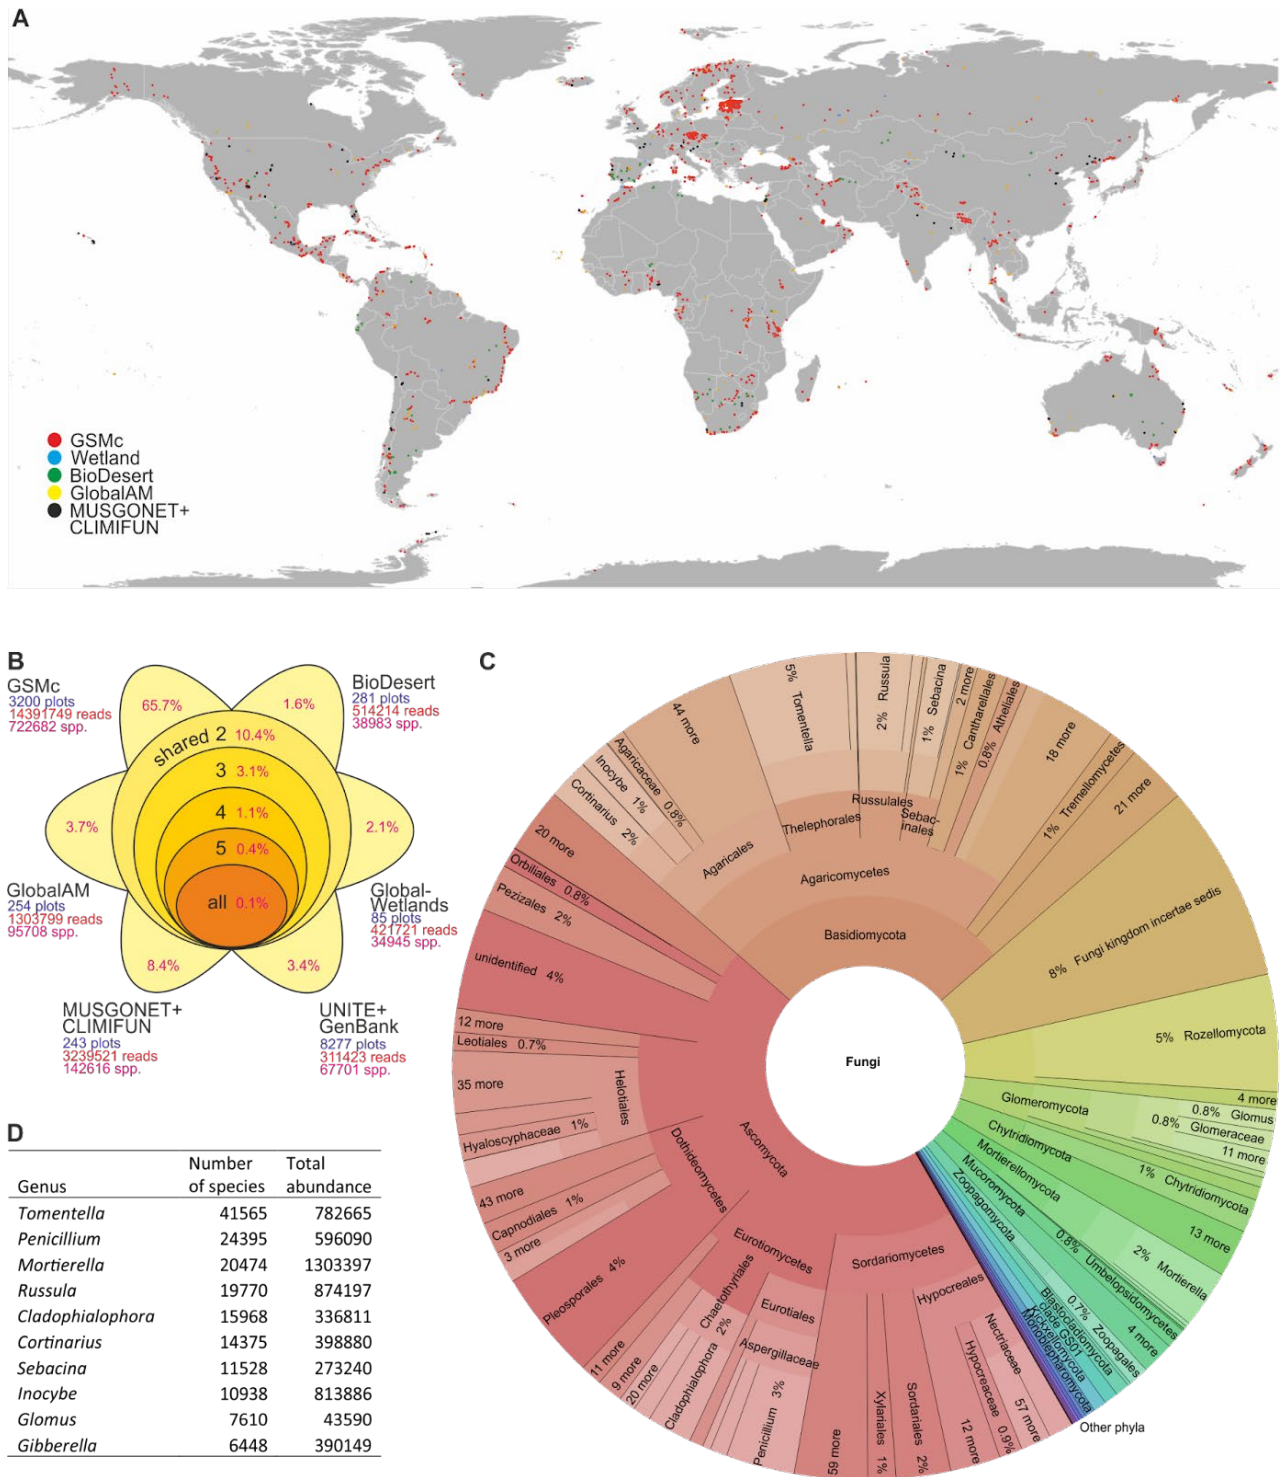

786

787

788 **Fig. 1. Distribution of samples and fungal species across datasets.** (A) Global sampling map, with different  
 789 symbols representing different datasets; (B) species distribution of fungi among datasets, with the proportion of  
 790 unique and shared species indicated in the diagram; (C) Krona chart indicating taxonomic distribution of fungal  
 791 species (interactive chart can be browsed at <https://plutof.ut.ee/#/doi/10.15156/BIO/2483900>); (D) species  
 792 richness and total read abundance of the top 10 most diverse fungal genera.

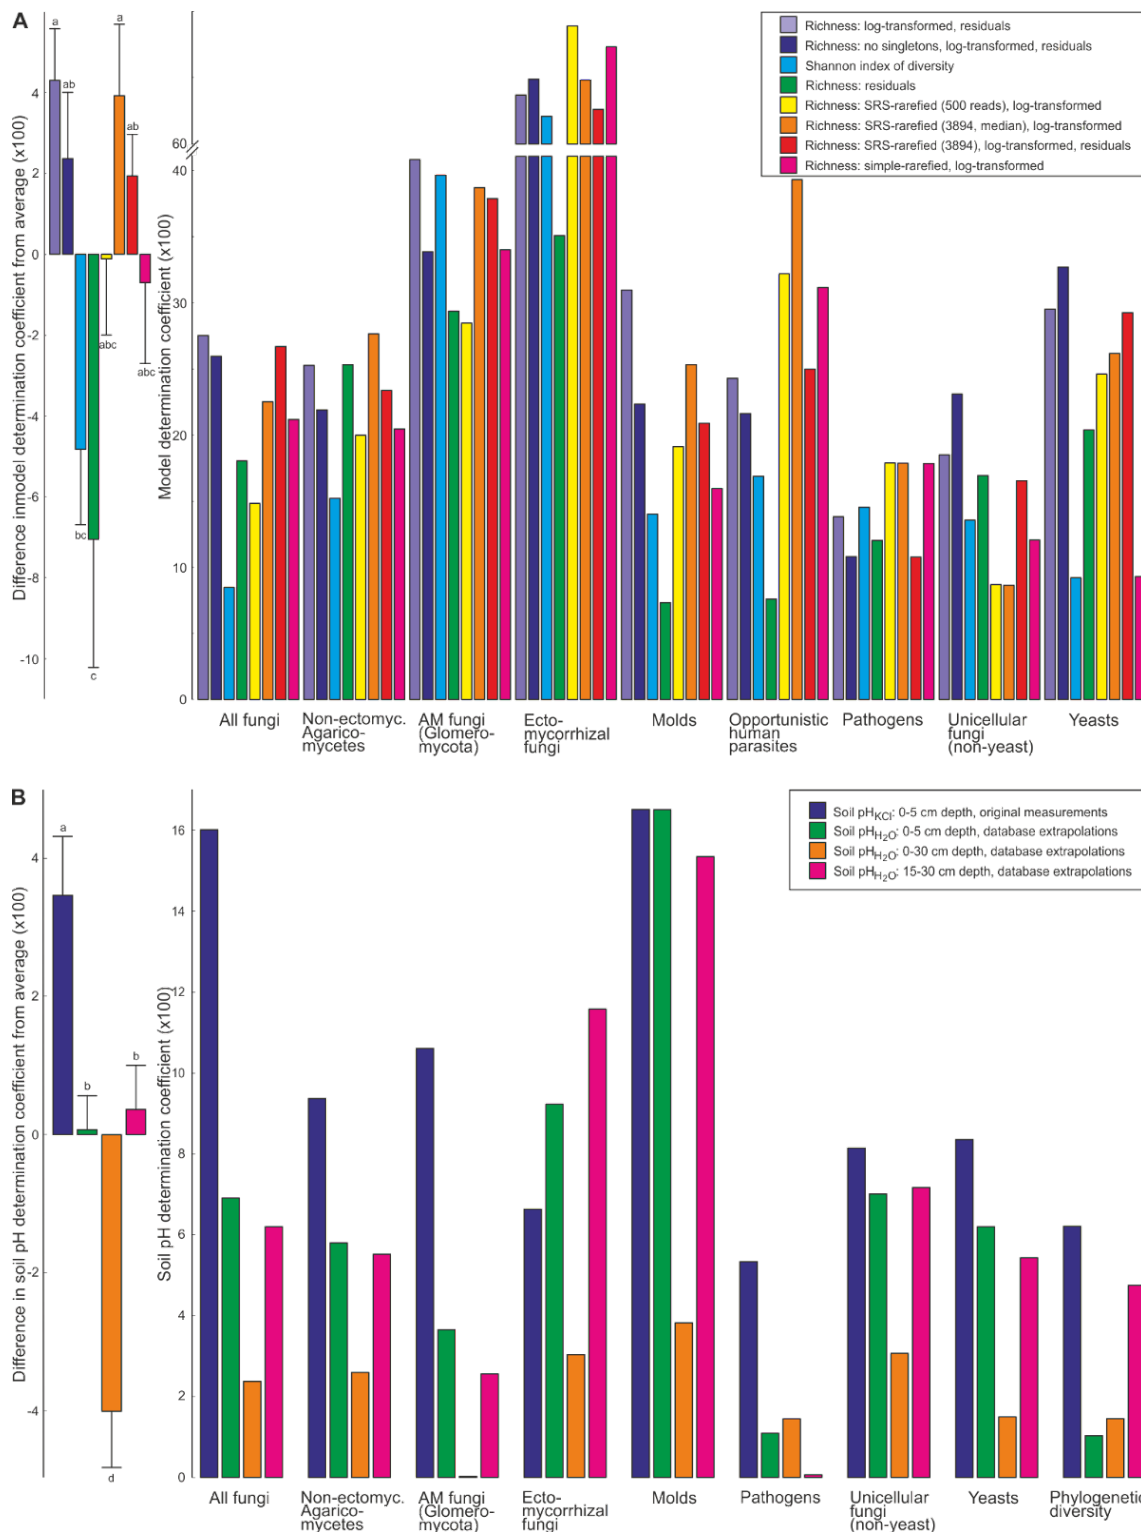

793

794

795 **Fig. 2. Comparison of (A) richness proxies (use of log-transformation, residuals of sequencing depth, SRS**  
 796 **or simple rarefaction) and (B) measures of soil pH on analytical performance.** Relative goodness was  
 797 estimated based on the determination coefficients of the best models (A) or pH-only models (B). In left panels,  
 798 significant among-group differences are indicated with different letters based on Tukey Posthoc tests; bars,  
 799 means; whiskers, SE. Soil pH<sub>KCl</sub> were determined experimentally, whereas pH<sub>H<sub>2</sub>O</sub> were obtained from Poggio et  
 800 al. (2021).

801

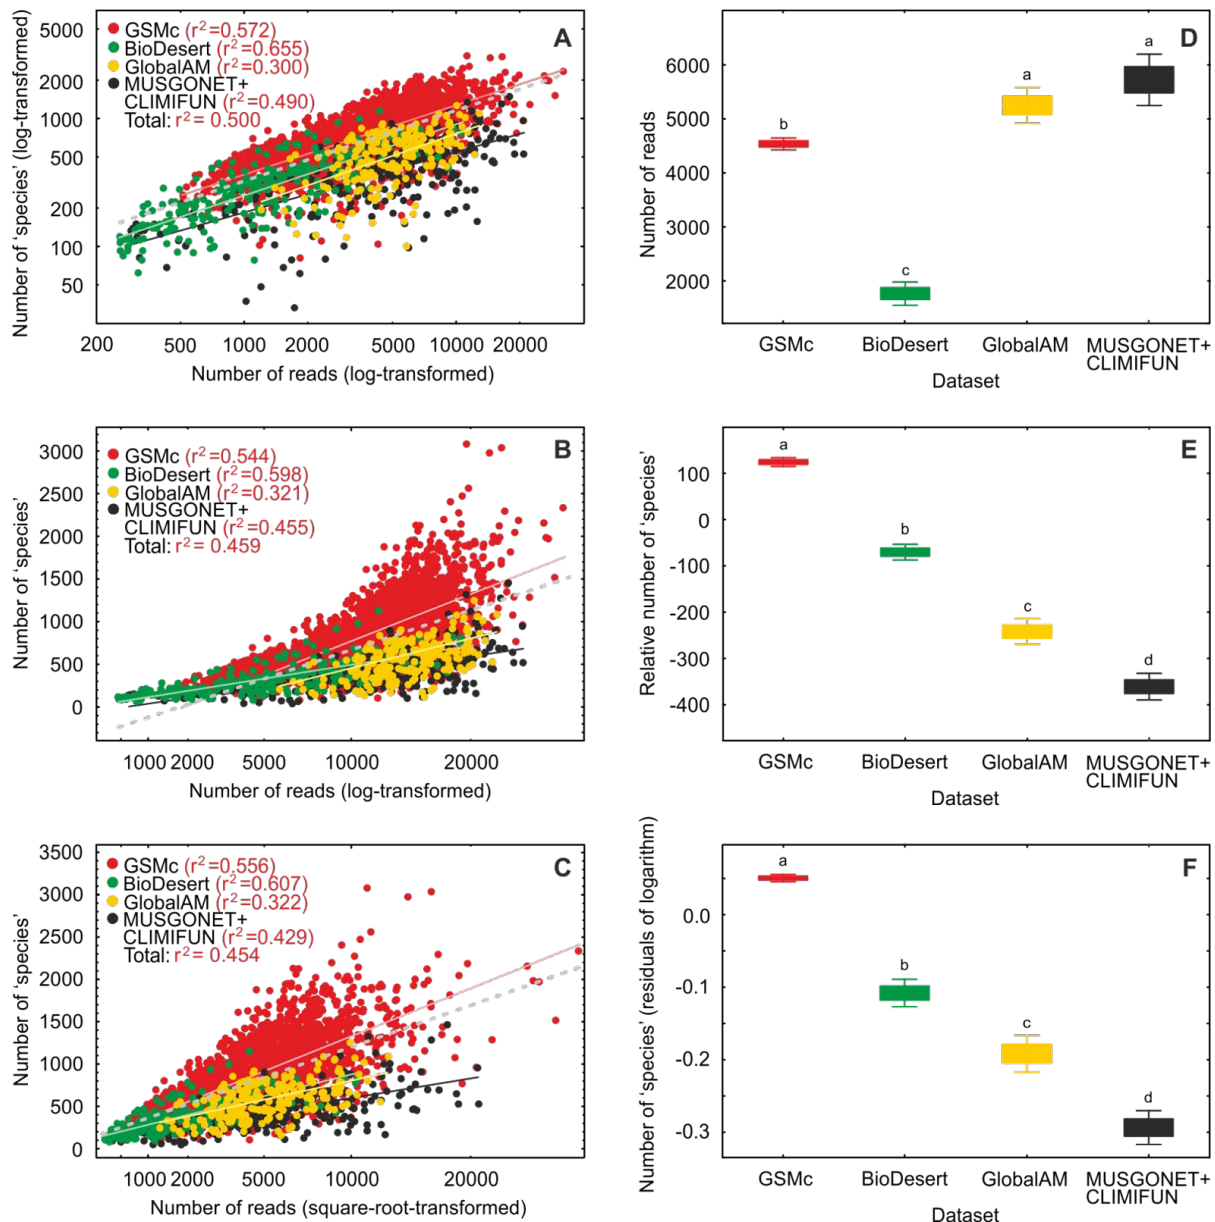

802

803

804 **Fig. 3. Relative 'species' accumulation curves (A-C), sequencing depth (D) and 'species' richness (E-F)**  
 805 **across four datasets.** (A) The log-log relationship between the number of reads and 'species' richness that was  
 806 used for calculation of residuals and further analyses; (B-C) Relatively lower performance of log-linear  
 807 relationships of log-transformed and square-root-transformed sequencing depth; (D) Initial differences in  
 808 sequencing depth among datasets; (E-F) Fungal 'species' richness differences relative to the average in the raw  
 809 data (E) and residuals of the log-log regression analysis (F). In D-F, boxes indicate standard errors around the  
 810 mean and whiskers indicate 95% confidence intervals; letters above whiskers indicate statistically significant  
 811 differences among datasets (using log-transformed data for D-E). These analyses indicate that the log-log  
 812 transformation for calculating residuals is relatively more robust compared with other methods and that richness  
 813 estimates from studies with different methods cannot be directly compared.

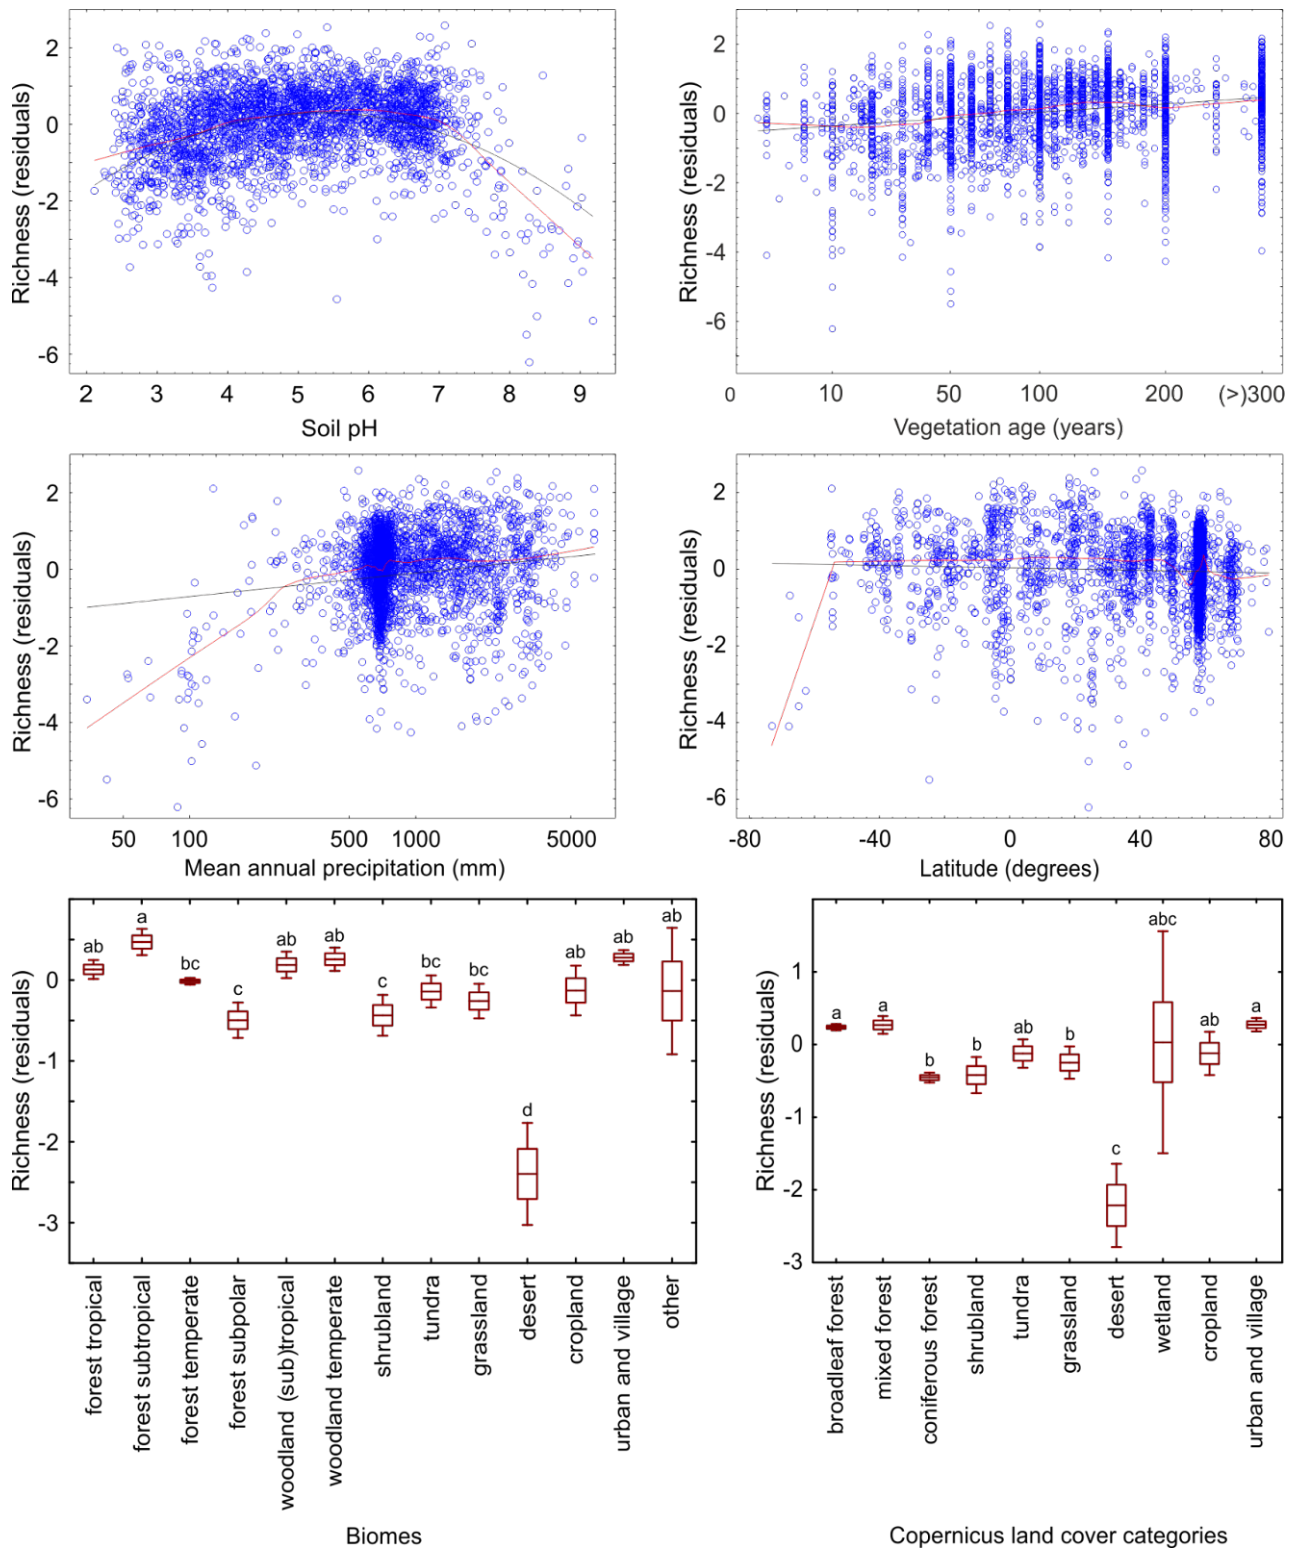

814

815

816 **Fig. 4. Response of  $\alpha$ -diversity of all fungi to soil pH, vegetation age, mean annual precipitation, latitude,**  
 817 **biomes, and land cover categories.** For continuous predictors, black lines indicate linear and polynomial fits  
 818 and red lines indicate lowess fits. For categorical predictors, boxes represent standard error around the mean  
 819 (central line), whiskers depict 95% CI and letters above boxes indicate statistically significant different groups  
 820 ( $P < 0.001$ ).

821



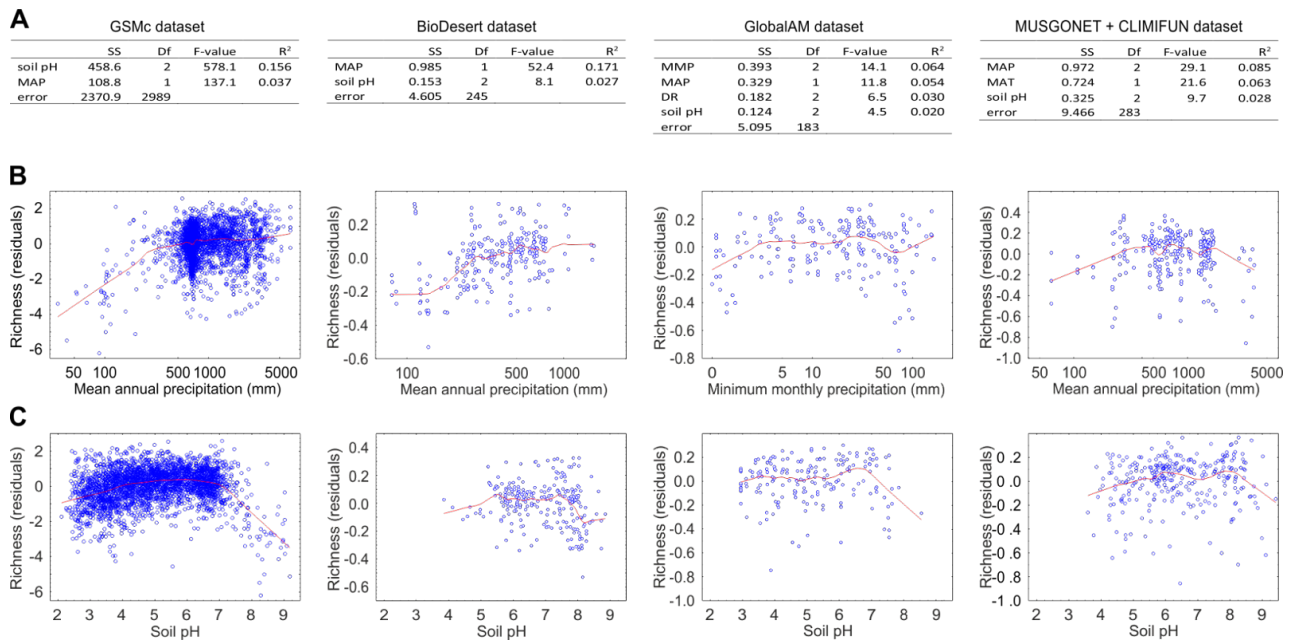

822

823

824 **Fig. 5. Comparison of  $\alpha$ -diversity patterns in all fungi across four most inclusive datasets: (A) best models**  
 825 **(only bioclimatic variables and soil pH were included in model selection), (B) lowess regression curves for**  
 826 **the best-fitting climatic predictor, and (C) lowess regression curves for soil pH.**

827

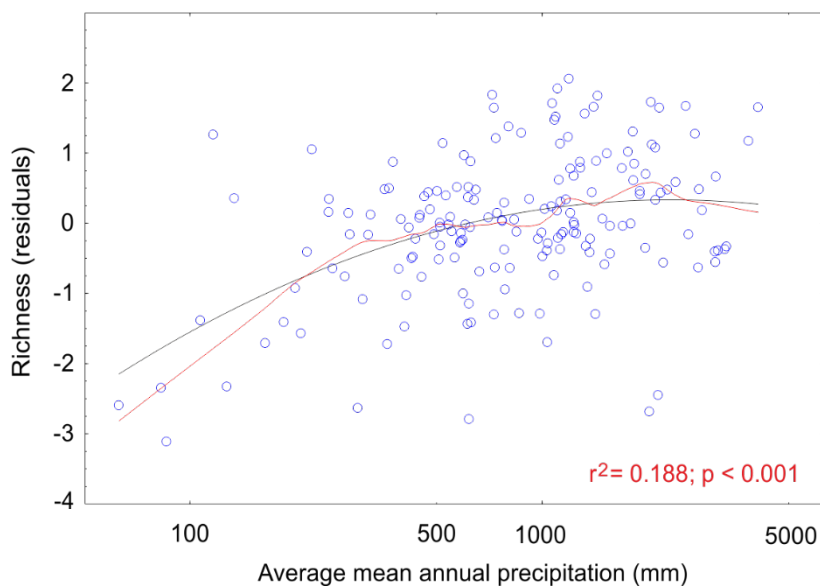

828

829

830 **Fig. 6. The effect of average mean annual precipitation on  $\gamma$ -diversity of fungi at the ecoregion scale. Black**  
 831 **line, best quadratic fit; red line, lowess curve.**

832

833

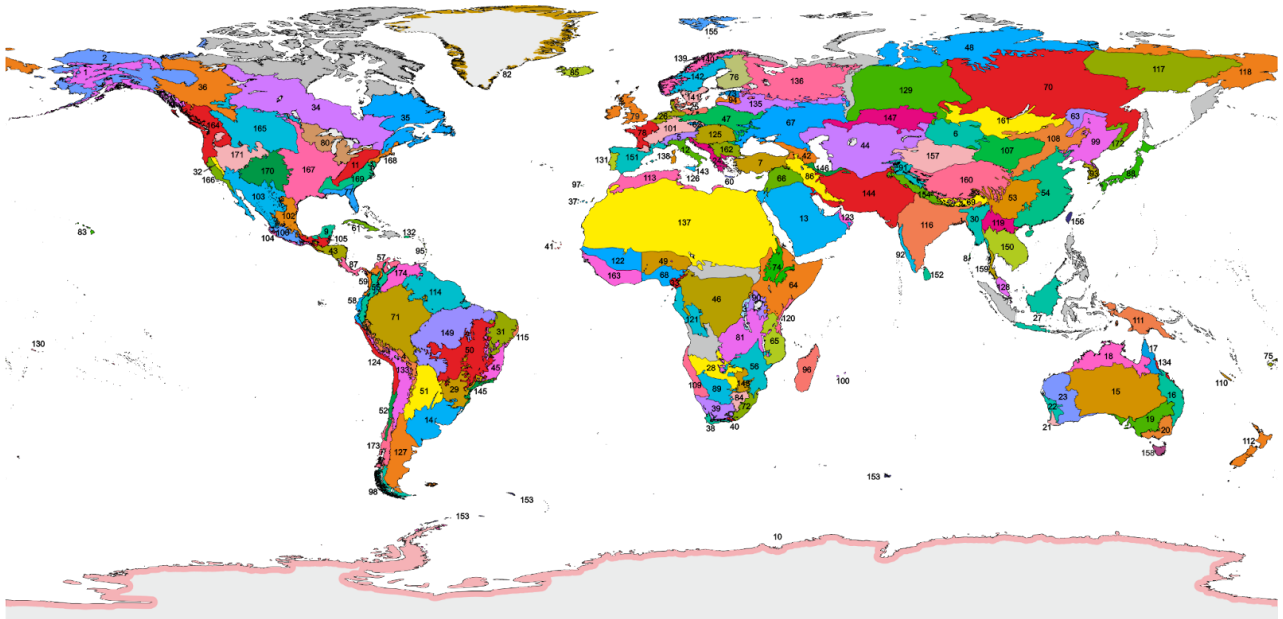

834

835

836 **Fig. 7. Distribution of 174 ecoregions used in endemicity analyses.** Ecoregions excluded from the analyses  
837 due to the lack of data are indicated in gray. Their explanation is given in Table 1.

838

839

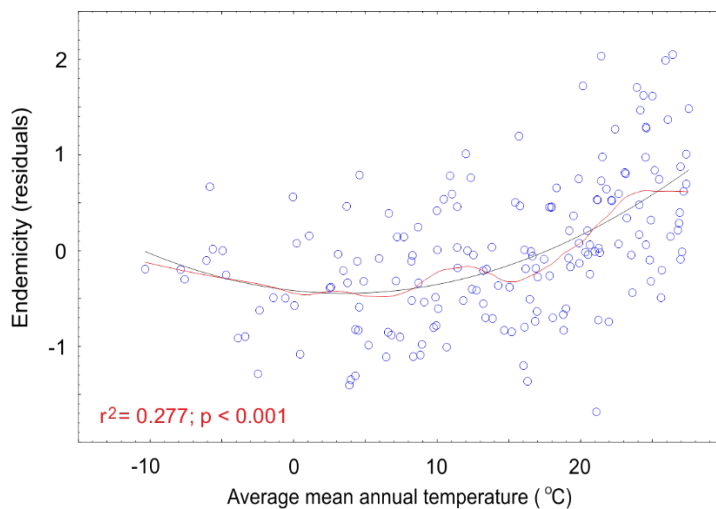

840

841

842 **Fig. 8. The effect of average mean annual precipitation on endemicity of fungi at the ecoregion scale.**  
843 Black line, best quadratic fit; red line, lowess curve.

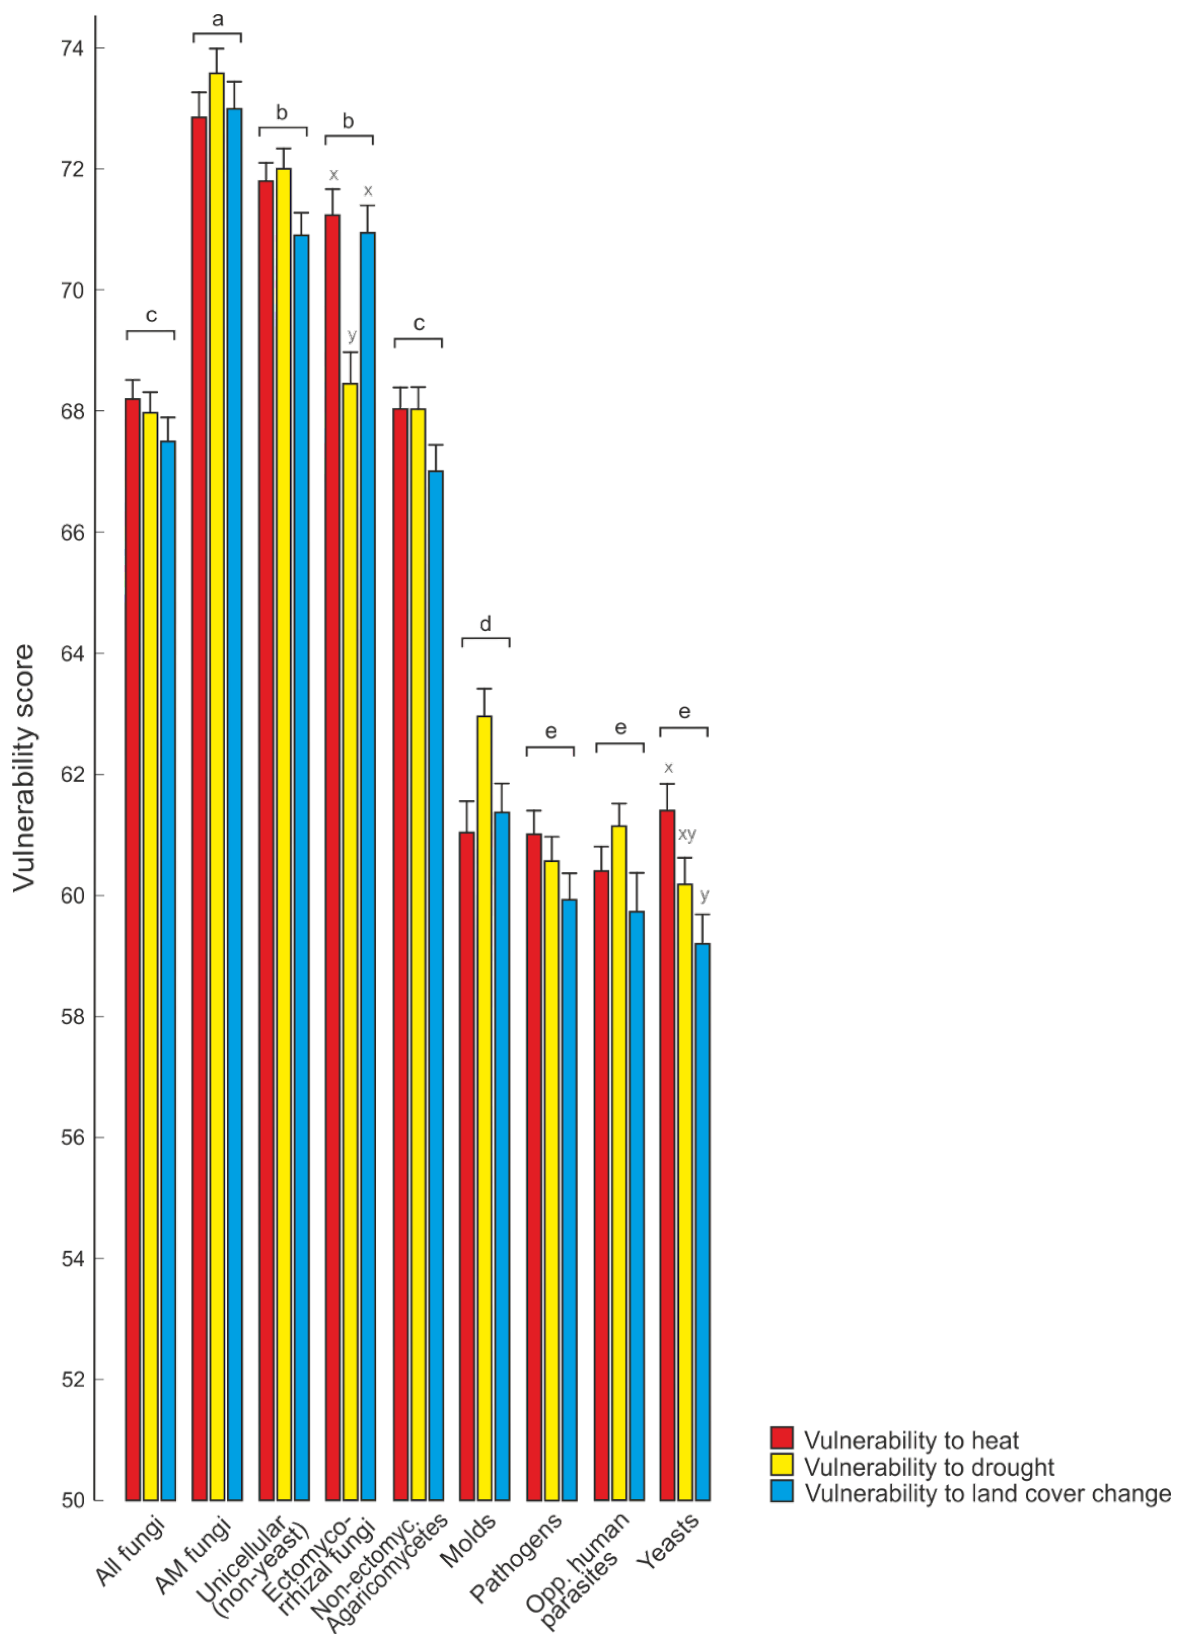

844

845

846 **Fig. 9. Vulnerability of fungi and functional groups to global change drivers.** Different letters indicate  
847 statistically significant ( $P < 0.001$ ) differences among functional groups (a-e) and among global change drivers  
848 within functional groups (x-z).

849

850

851

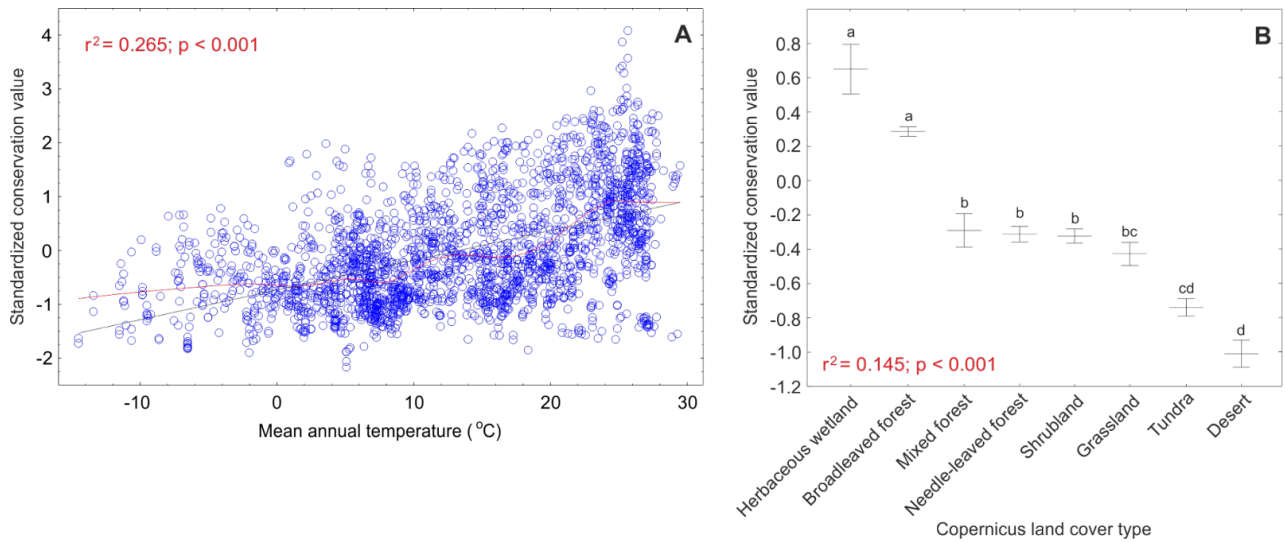

852

853

854 **Fig. 10. Relationships between conservation priority areas with mean annual temperature (A) and**  
855 **Copernicus land cover types (B).** In A, black and red lines indicate best-fitting linear and lowess functions,  
856 respectively. In B, central lines and whiskers indicate mean and standard errors, respectively; letters above  
857 whiskers indicate statistically significant differences among land cover types.

858

## Calculation of endemism indices

To estimate endemism at the ecoregion level, we calculated five endemism indices ( $E_1$ - $E_5$ ). Weighted endemism indices were calculated based on these five indices using z-transformation of residuals in regression analyses against sequencing and sampling depth.

### Five endemism indices

|                                                                                                                       |                                                                                                          |                                                                                                                                                                     |
|-----------------------------------------------------------------------------------------------------------------------|----------------------------------------------------------------------------------------------------------|---------------------------------------------------------------------------------------------------------------------------------------------------------------------|
| $E_1$ Number of endemic species                                                                                       | $E_1$                                                                                                    |                                                                                                                                                                     |
| $E_2$ Proportion of endemic species                                                                                   | $E_2 = \frac{E_1}{S}$                                                                                    | $S$ , total species richness in ecoregion                                                                                                                           |
| $E_3$ Mean maximum range of species (average weighted endemism; Crisp et al. 2001)                                    | $E_3 = \frac{\sum_i d_i}{S}$                                                                             | $d_i$ , range of species $i$                                                                                                                                        |
| $E_4$ Jaccard index of similarity (Jaccard 1912)                                                                      | $E_4(C_1, C_2) = \frac{C_1 \cap C_2}{C_1 \cup C_2}$                                                      | $C$ , ecoregion communities                                                                                                                                         |
| $E_5$ $\beta_{SIM}$ index of similarity (multiple-site Simpson-based community similarity index, Baselga et al. 2010) | $E_5 = \frac{\sum_{i < j} \min(b_{ij}, b_{ji})}{\sum_i (S_i - S_i) + \sum_{i < j} \min(b_{ij}, b_{ji})}$ | $S_i$ , number of species in site $i$<br>$S_j$ , total number of species<br>$b_{ij}$ and $b_{ji}$ , number of species exclusive to sites $i$ and $j$ , respectively |

### Accounting for sampling and sequencing depth for endemism indices

|                                          |                                                                                                                                                                                                                                                                                                                                            |                                                                                                                                                                     |
|------------------------------------------|--------------------------------------------------------------------------------------------------------------------------------------------------------------------------------------------------------------------------------------------------------------------------------------------------------------------------------------------|---------------------------------------------------------------------------------------------------------------------------------------------------------------------|
| $E_{nR}$ residuals of $n$ endemism index | $E_{nR} = E_n - \hat{E}_n$<br>$\hat{E}_n = \beta_1 \text{Log}(L_1 + L_2) + \beta_2 \text{Log}(R_1 + R_2) + \beta_3 \text{Log}(L_1) + \beta_4 \text{Log}(L_2) + \beta_5 \text{Log}(R_1) + \beta_6 \text{Log}(R_2) + \beta_7(L_1 + L_2) + \beta_8(R_1 + R_2) + \beta_9 L_1 + \beta_{10} L_2 + \beta_{11} R_1 + \beta_{12} R_2 + \varepsilon$ | $L_1$ , number of soil sampling localities<br>$L_2$ , number of UNITE localities<br>$R_1$ , number of reads of soil samples<br>$R_2$ , number of UNITE Sanger reads |
|------------------------------------------|--------------------------------------------------------------------------------------------------------------------------------------------------------------------------------------------------------------------------------------------------------------------------------------------------------------------------------------------|---------------------------------------------------------------------------------------------------------------------------------------------------------------------|

Residuals are calculated based on the best-fitting model.

### Standardizing residuals of endemism indices

|                                  |                                         |                                                                      |
|----------------------------------|-----------------------------------------|----------------------------------------------------------------------|
| $E_{nRz}$ Z-transformed $E_{nR}$ | $E_{nRz} = \frac{E_{nR} - \mu}{\sigma}$ | $\mu$ , mean $E_{nR}$<br>$\sigma$ , standard deviation of $E_{nR}$ . |
|----------------------------------|-----------------------------------------|----------------------------------------------------------------------|

### Weighting standardized endemism indices

|                              |                                                                        |
|------------------------------|------------------------------------------------------------------------|
| $E_{ave}$ weighted $E_{nRz}$ | $E_{ave} = \frac{E_{1Rz} + E_{2Rz} + 2E_{3Rz} + E_{4Rz} + E_{5Rz}}{6}$ |
|------------------------------|------------------------------------------------------------------------|

$E_3$  receives double weight, because  $E_1$  and  $E_2$  as well as  $E_3$  and  $E_4$  are calculated on a similar basis.

### Correlation matrix of endemism indices

|           | $E_{ave}$ | $E_{1Rz}$ | $E_{2Rz}$ | $E_{3Rz}$ | $E_{4Rz}$ | $E_{5Rz}$ |
|-----------|-----------|-----------|-----------|-----------|-----------|-----------|
| $E_{ave}$ | 1.000     | 0.767     | 0.805     | 0.554     | 0.754     | 0.816     |
| $E_{1Rz}$ | 0.767     | 1.000     | 0.806     | 0.188     | 0.452     | 0.540     |
| $E_{2Rz}$ | 0.805     | 0.806     | 1.000     | 0.072     | 0.788     | 0.745     |
| $E_{3Rz}$ | 0.554     | 0.188     | 0.072     | 1.000     | 0.169     | 0.270     |
| $E_{4Rz}$ | 0.754     | 0.452     | 0.788     | 0.169     | 1.000     | 0.782     |
| $E_{5Rz}$ | 0.816     | 0.540     | 0.745     | 0.270     | 0.782     | 1.000     |

### Correlation matrix of average endemism of fungal groups

|                            | 1     | 2     | 3     | 4     | 5     | 6     | 7     | 8     | 9     |
|----------------------------|-------|-------|-------|-------|-------|-------|-------|-------|-------|
| all fungi (1)              | 1.000 | 0.797 | 0.591 | 0.517 | 0.568 | 0.628 | 0.675 | 0.619 | 0.523 |
| non-EcM Agaricomycetes (2) | 0.797 | 1.000 | 0.790 | 0.398 | 0.461 | 0.470 | 0.460 | 0.595 | 0.532 |
| AM fungi (3)               | 0.591 | 0.790 | 1.000 | 0.280 | 0.375 | 0.232 | 0.233 | 0.578 | 0.461 |
| EcM fungi (4)              | 0.517 | 0.398 | 0.280 | 1.000 | 0.234 | 0.268 | 0.250 | 0.270 | 0.176 |
| molds (5)                  | 0.568 | 0.461 | 0.375 | 0.234 | 1.000 | 0.600 | 0.413 | 0.364 | 0.513 |
| OHP (6)                    | 0.628 | 0.470 | 0.232 | 0.268 | 0.600 | 1.000 | 0.809 | 0.159 | 0.354 |
| pathogens (7)              | 0.675 | 0.460 | 0.233 | 0.250 | 0.413 | 0.809 | 1.000 | 0.264 | 0.331 |
| unicellular fungi (8)      | 0.619 | 0.595 | 0.578 | 0.270 | 0.364 | 0.159 | 0.264 | 1.000 | 0.463 |
| yeasts (9)                 | 0.523 | 0.532 | 0.461 | 0.176 | 0.513 | 0.354 | 0.331 | 0.463 | 1.000 |

### References

Baselga, A. Partitioning the turnover and nestedness components of beta diversity. *Glob. Ecol. Biogeogr.* **19**, 134-143 (2010).  
859 Jaccard, P. The distribution of the flora in the alpine zone. *New Phytol.* **11**, 37-50 (1912).

860

861 **Box 1. Calculation of endemism indices and correlation among standardized indices for all fungi and**  
862 **among functional groups.**

863

864 **Table 1. The ecoregions used in endemicity analyses.**

| Ecoregion number | Putative name                            |
|------------------|------------------------------------------|
| 1                | Alaskan forests                          |
| 2                | Alaskan tundra                           |
| 3                | Albertine Rift montane forests           |
| 4                | Yunga                                    |
| 5                | Alps conifer and mixed forests           |
| 6                | Altai steppes and semideserts            |
| 7                | Anatolian forests                        |
| 8                | Andaman Islands rain forests             |
| 9                | Yucatan forests                          |
| 10               | Antarctic desert                         |
| 11               | Appalachian mixed forests                |
| 12               | Appennine forests                        |
| 13               | Arabic drylands                          |
| 14               | Argentina savanna                        |
| 15               | Australia Central drylands               |
| 16               | Australia E subtropical woodlands        |
| 17               | Australia NE savannas                    |
| 18               | Australia NW savannas                    |
| 19               | Australia SE shrublands and savannas     |
| 20               | Australia SE temperate forests           |
| 21               | Australia SW woodlands                   |
| 22               | Australia W savannas                     |
| 23               | Australia W shrublands                   |
| 24               | Balkan forests                           |
| 25               | Baltic mixed forests                     |
| 26               | Benelux Atlantic mixed forests           |
| 27               | Borneo-Java rain forests                 |
| 28               | Botswana woodlands                       |
| 29               | Brazil S forests                         |
| 30               | Burman forests                           |
| 31               | Caatinga                                 |
| 32               | California Sierra Nevada forests         |
| 33               | Cameroon W forests                       |
| 34               | Canada N boreal forests                  |
| 35               | Canada NE boreal forests                 |
| 36               | Canada NW boreal forests                 |
| 37               | Canary Islands dry woodlands and forests |
| 38               | Cape fynbos                              |
| 39               | Cape karoo                               |
| 40               | Cape thickets                            |
| 41               | Cape Verde Islands dry forests           |
| 42               | Caucasia                                 |
| 43               | Central American forests                 |
| 44               | Central Asian drylands                   |

- 45 Central Atlantic rain forests
- 46 Central Congolian forests
- 47 Central European mixed forests
- 48 Central Siberian tundra
- 49 Central Sudanian savanna
- 50 Cerrado
- 51 Chaco
- 52 Chilean matorral
- 53 China Central forests
- 54 China E forests
- 55 Colombia montane forests
- 56 Zimbabwe-Mozambique woodlands
- 57 Colombia N forests
- 58 Colombia SW dry forests
- 59 Colombia W forests
- 60 Crete Mediterranean forests
- 61 Cuba forests
- 62 Czech mixed forests
- 63 Da Hinggan-Dzhagdy Mountains conifer forests
- 64 East African shrublands
- 65 East African woodlands
- 66 East Asian drylands
- 67 East European forest steppe
- 68 East Guinean forests
- 69 East Himalayan forests
- 70 East Siberia forest and mountain tundra
- 71 West Amazon forests
- 72 Eastern South African woodlands
- 73 Estonian Sarmatic mixed forests
- 74 Ethiopian montane woodlands
- 75 Fiji forests
- 76 Finland taiga
- 77 Florida forests
- 78 France Atlantic mixed forests
- 79 Great Britain Forests
- 80 Great Lakes forests
- 81 Zambia woodlands
- 82 Greenland tundra
- 83 Hawaii forests
- 84 Highveld grasslands
- 85 Iceland boreal birch forests and alpine tundra
- 86 Zagros Mountains forest steppe
- 87 Isthmian forests
- 88 Japan forests
- 89 Kalahari xeric savanna
- 90 Victoria Basin forest-savanna mosaic
- 91 Karakoram drylands

- 92 Western Ghats forests
- 93 Korean forests
- 94 Latvian Sarmatic mixed forests
- 95 Lesser Antilles forests
- 96 Madagascar woodlands
- 97 Madeira evergreen forests
- 98 Magellanic subpolar forests
- 99 Manchurian forests
- 100 Mascarene forests
- 101 Western European broadleaf forests
- 102 Mexico NE shrublands and forests
- 103 Mexico NW deserts and montane forests
- 104 Mexico S dry forests
- 105 Mexico SW lowland forests
- 106 Mexico SW montane forests
- 107 Mongolian deserts
- 108 Mongolian steppe
- 109 Namib drylands
- 110 New Caledonia forests
- 111 New Guinea forests
- 112 New Zealand forests
- 113 North African woodlands
- 114 North Amazon forests
- 115 North Atlantic rain forests
- 116 North India moist forests
- 117 Northeast Siberian taiga
- 118 Northeast Siberian tundra
- 119 Northern Indochina subtropical forests
- 120 Northern Zanzibar-Inhambane coastal forest mosaic
- 121 Western Congolian forests
- 122 West Sudanian savanna
- 123 Oman drylands
- 124 Pacific deserts
- 125 Pannonian forests
- 126 Pantelleria-Lampedusa forests
- 127 Patagonian steppe
- 128 Peninsular Malaysian rain forests
- 129 West Siberian forests
- 130 Polynesian forests
- 131 Portugal woodlands
- 132 Puerto Rico forests
- 133 Puna
- 134 Queensland tropical rain forests
- 135 Russian Sarmatic mixed forests
- 136 Russian taiga
- 137 Sahelian drylands
- 138 Sardinian-Corsican forests



- 139 Scandinavian coastal conifer forests
  - 140 Scandinavian Montane Birch forest and grasslands
  - 141 Scandinavian Sarmatic mixed forests
  - 142 Scandinavian taiga
  - 143 Sicilian forests
  - 144 South Asian drylands
  - 145 South Atlantic rain forests
  - 146 South Caspian forests
  - 147 South Siberian steppe
  - 148 Southeast African bushveld
  - 149 Southeast Amazon forests
  - 150 Southern Indochina tropical forests
  - 151 Spain woodlands
  - 152 Sri Lanka forests
  - 153 Subantarctic islands tundra
  - 154 West Himalayan forests
  - 155 Svalbard Arctic desert
  - 156 Taiwan forests
  - 157 Tarim basin drylands
  - 158 Tasmanian forests
  - 159 Tenasserim-South Thailand semi-evergreen rain forests
  - 160 Tibetan steppe
  - 161 Trans-Baikal forests
  - 162 Transylvanian forests
  - 163 West Guinean forests
  - 164 USA California chaparral
  - 165 USA Central forests and grasslands
  - 166 USA NE hemiboreal forests
  - 167 USA SE forests
  - 168 USA Southern Rockies and steppe
  - 169 USA western steppe and montane forests
  - 170 USA-Canada Pacific forests and grasslands
  - 171 USA-Canada Rockies and central forests and grasslands
  - 172 Ussuri broadleaf and mixed forests
  - 173 Valdivian temperate forests
  - 174 Venezuela woodlands
- 

865

866

867 **Table 2. The best predictors of endemism indices in ecoregions for all fungi.**

|                         | DF  | Sum of squares | Mean squares | F-value | R <sup>2</sup> <sub>adj</sub> | P-value | Trend    |
|-------------------------|-----|----------------|--------------|---------|-------------------------------|---------|----------|
| MAT <sub>mean</sub>     | 2   | 27.2           | 13.6         | 97.4    | 0.277                         | <0.001  | U-shaped |
| soil pH <sub>mean</sub> | 1   | 10.6           | 10.6         | 38.2    | 0.108                         | <0.001  | negative |
| subcontinent: Europe    | 1   | 6.5            | 6.5          | 23.5    | 0.065                         | <0.001  | negative |
| human footprint index   | 1   | 2.1            | 2.1          | 7.5     | 0.018                         | 0.007   | negative |
| error                   | 168 | 48.3           |              |         |                               |         |          |

868

869 **Table 3. The best models of conservation priority co-kriging maps for fungi. All P-values are <0.001.**

|                              | Df   | Sum of squares | Mean squares | F-value | R <sup>2</sup> <sub>adj</sub> | Trend    |
|------------------------------|------|----------------|--------------|---------|-------------------------------|----------|
| air MAT <sup>1</sup>         | 2    | 2133           | 1066         | 1426    | 0.266                         | positive |
| MPWM                         | 1    | 992            | 992          | 663     | 0.134                         | positive |
| climate isothermality        | 1    | 169            | 169          | 113     | 0.023                         | positive |
| MAP                          | 2    | 167            | 84           | 112     | 0.022                         | positive |
| Land cover type <sup>2</sup> | 7    | 128            | 18           | 12      | 0.015                         |          |
| Land cover type x MAP        | 7    | 121            | 17           | 12      | 0.014                         |          |
| error                        | 2477 | 3705           |              |         |                               |          |

<sup>1</sup>Abbreviations: MAP, mean annual precipitation; MAT, mean annual temperature; MPWM, mean precipitation of wettest month;

<sup>2</sup>Copernicus land cover types: broadleaf forest, mixed forest, coniferous forest, shrubland, tundra, grassland, desert, wetland (note that cropland and urban and village biomes were excluded).

870
